# Supplementary material for: Substrate-dependent competition and cooperation relationships between Geobacter and Dehalococcoides for their organohalide respiration
Source: PubMed Central journal article supplement (PMC9723705; doi:10.1038/s43705-021-00025-z), 2021-06-09
Supplement: 43705_2021_25_MOESM1_ESM.pdf [file 43705_2021_25_MOESM1_ESM.pdf]

## Supplementary Figures for

# Substrate-dependent competition and cooperation relationships between *Geobacter* and *Dehalococcoides* for their organohalide respiration

Yongyi Liang, Qihong Lu, Zhiwei Liang, Xiaokun Liu, Wenwen Fang, Jialiang Kuang,  
Dawei Liang, Rongliang Qiu, Zhili He and Shanquan Wang\*

Corresponding author: Shanquan Wang (wangshanquan@mail.sysu.edu.cn)

The PDF file includes:

- Fig. S1. Reductive dechlorination of PCE.
- Fig. S2. The microbial community composition of PCE-dechlorinating microcosms in different transfers.
- Fig. S3. Conformation of culture purity with SEM and SNP profiling analyses.
- Fig. S4. Phylogeny of *Geobacter lovleyi* LYY.
- Fig. S5. PCE dechlorination in *Geobacter lovleyi* LYY pure cultures.
- Fig. S6. Genomic characterization of *Geobacter lovleyi* LYY.
- Fig. S7. A plasmid map of *Geobacter lovleyi* LYY.
- Fig. S8. Predicted metabolic capabilities of *Geobacter lovleyi* LYY.
- Fig. S9. PCE dechlorination in a *Geobacter-Dehalococcoides* co-culture.

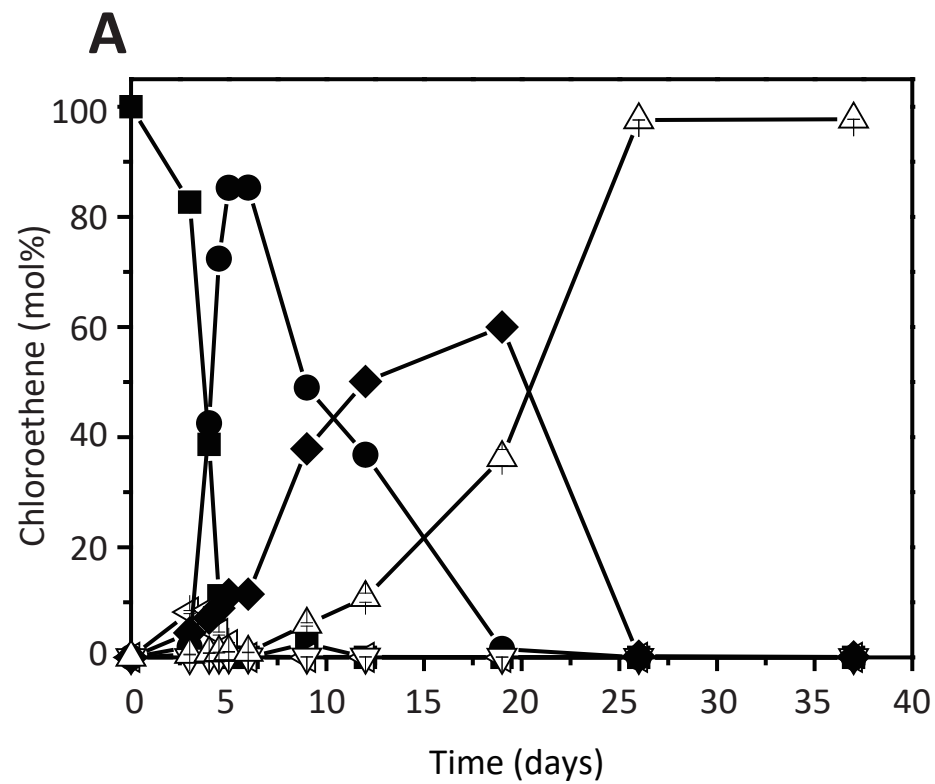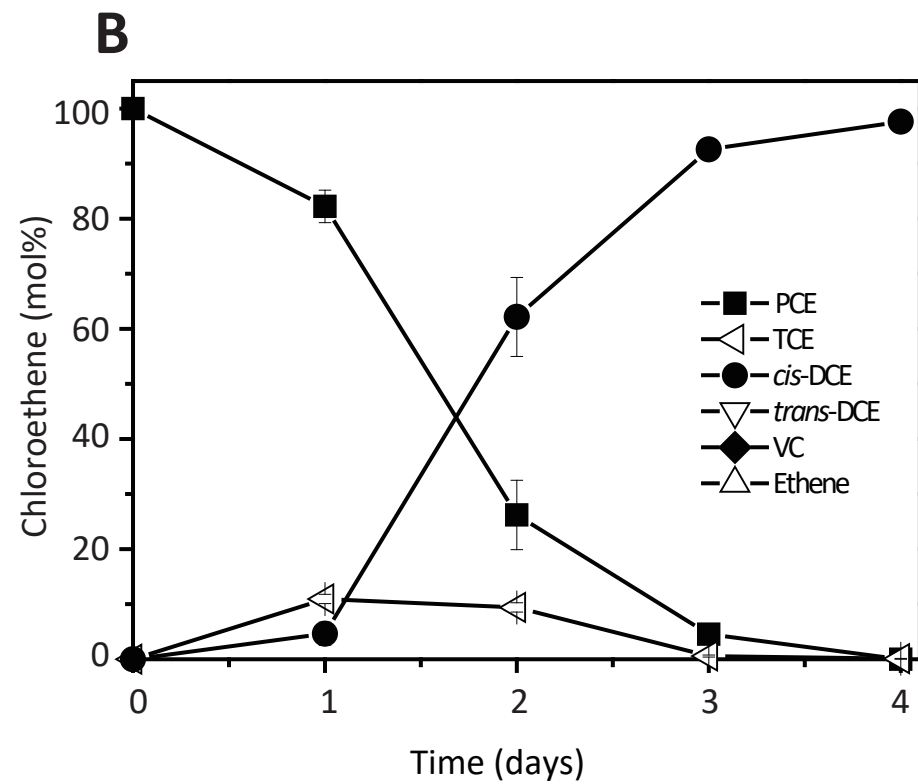

**Fig. S1. Reductive dechlorination of PCE. (A)** PCE dechlorination in microcosm LY (T1). **(B)** PCE dechlorination in *Geobacter lovleyi* LYY pure culture. Error bars represent SDs of triplicate cultures.

| Taxonomy       |                                  | Relative abundances (%) of predominant genera |       |       |       |       |       |
|----------------|----------------------------------|-----------------------------------------------|-------|-------|-------|-------|-------|
|                |                                  | T2                                            | T3    | T7    | T8    | T14   | T25   |
| Bacteroidetes  | <i>Lentimicrobium</i>            | 1.92                                          | 14.18 | 2.92  | 0.75  | 0.00  | 0.00  |
|                | Blvii28                          | 0.40                                          | 0.02  | 0.09  | 0.23  | 0.00  | 0.00  |
|                | Bacteroidales_unculture          | 1.92                                          | 0.13  | 0.46  | 0.13  | 0.01  | 0.01  |
|                | Rikenellaceae_unculture          | 0.01                                          | 0.03  | 0.05  | 0.04  | 0.01  | 0.00  |
| Chloroflexi    | <i>Dehalococcides</i>            | 68.87                                         | 52.61 | 0.65  | 0.39  | 0.07  | 0.05  |
|                | <i>Dehalogenimonas</i>           | 0.00                                          | 0.05  | 0.00  | 0.00  | 0.00  | 0.00  |
| Cloacimonetes  | <i>Ca. Cloacimonas</i>           | 3.51                                          | 0.15  | 0.03  | 0.03  | 0.00  | 0.00  |
| Firmicutes     | <i>Acetobacterium</i>            | 0.33                                          | 0.41  | 17.76 | 28.29 | 0.05  | 0.05  |
|                | <i>Clostridium</i>               | 0.25                                          | 0.25  | 0.48  | 0.35  | 0.21  | 0.18  |
|                | <i>Tyzzereella</i>               | 0.16                                          | 0.04  | 30.04 | 0.15  | 0.00  | 0.00  |
|                | <i>Soehngenia</i>                | 0.16                                          | 0.19  | 0.18  | 0.17  | 0.00  | 0.00  |
|                | <i>Acidaminobacter</i>           | 0.17                                          | 0.10  | 2.11  | 0.06  | 0.02  | 0.01  |
|                | <i>Syntrophomonas</i>            | 0.78                                          | 0.02  | 0.06  | 0.06  | 0.01  | 0.01  |
|                | <i>Pelotomaculum</i>             | 1.11                                          | 0.01  | 0.01  | 0.01  | 0.00  | 0.00  |
|                | <i>Youngiibacter</i>             | 0.43                                          | 0.22  | 0.47  | 0.58  | 0.00  | 0.00  |
|                | <i>Sedimentibacter</i>           | 0.16                                          | 0.00  | 0.02  | 0.04  | 0.03  | 0.01  |
|                | Deltaproteobacteria_unclassified | 0.04                                          | 0.08  | 6.69  | 1.23  | 0.00  | 0.00  |
| Proteobacteria | <i>Geobacter</i>                 | 0.35                                          | 0.61  | 15.18 | 46.53 | 95.42 | 97.45 |
|                | <i>Smithella</i>                 | 0.02                                          | 0.23  | 0.08  | 0.06  | 0.01  | 0.00  |
|                | <i>Syntrophus</i>                | 0.77                                          | 0.02  | 0.00  | 0.00  | 0.00  | 0.00  |
|                | <i>Desulfitobacterium</i>        | 0.11                                          | 0.07  | 0.08  | 0.09  | 0.00  | 0.00  |
|                | <i>Desulfovibrio</i>             | 0.30                                          | 0.01  | 0.00  | 0.00  | 0.00  | 0.00  |
| Spirochaetes   | <i>Treponema</i>                 | 6.45                                          | 0.00  | 0.00  | 0.00  | 0.01  | 0.01  |
|                | <i>Sphaerochaeta</i>             | 1.96                                          | 0.02  | 0.01  | 0.01  | 0.05  | 0.05  |
| Tenericutes    | <i>Acholeplasma</i>              | 0.76                                          | 0.00  | 0.02  | 0.01  | 0.00  | 0.00  |
| Euryarchaeota  | Bacteria_others                  | 1.78                                          | 2.78  | 3.58  | 0.71  | 0.03  | 0.03  |
|                | <i>Methanosaeta</i>              | 1.68                                          | 14.18 | 0.01  | 0.06  | 0.00  | 0.01  |
|                | <i>Methanobacterium</i>          | 0.56                                          | 0.05  | 0.12  | 0.22  | 0.00  | 0.00  |

**Fig. S2. The microbial community composition of PCE-dechlorinating microcosms in different transfers.** Only genera with relative abundances higher than 0.05% in one or more of the microcosms are shown.

**A**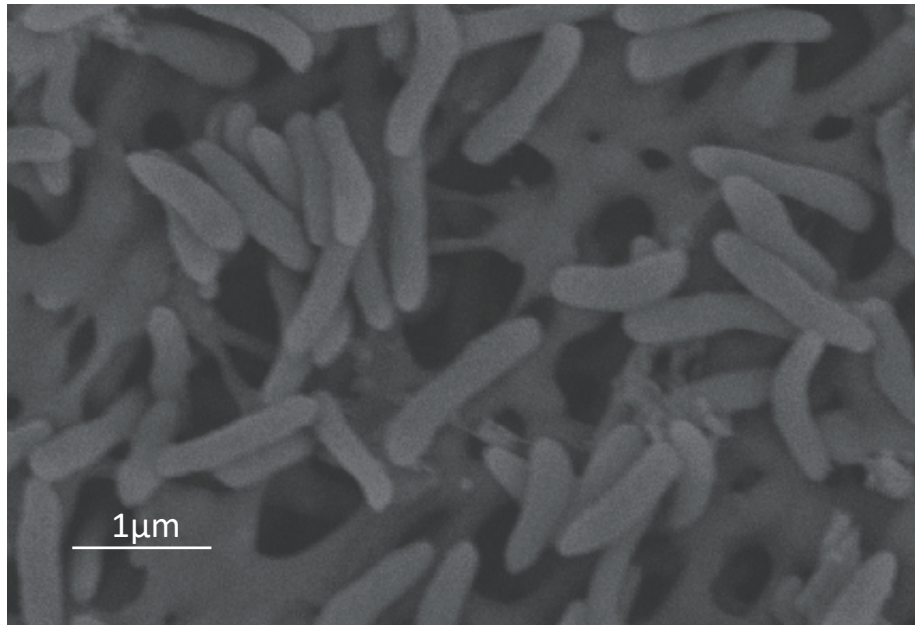**B**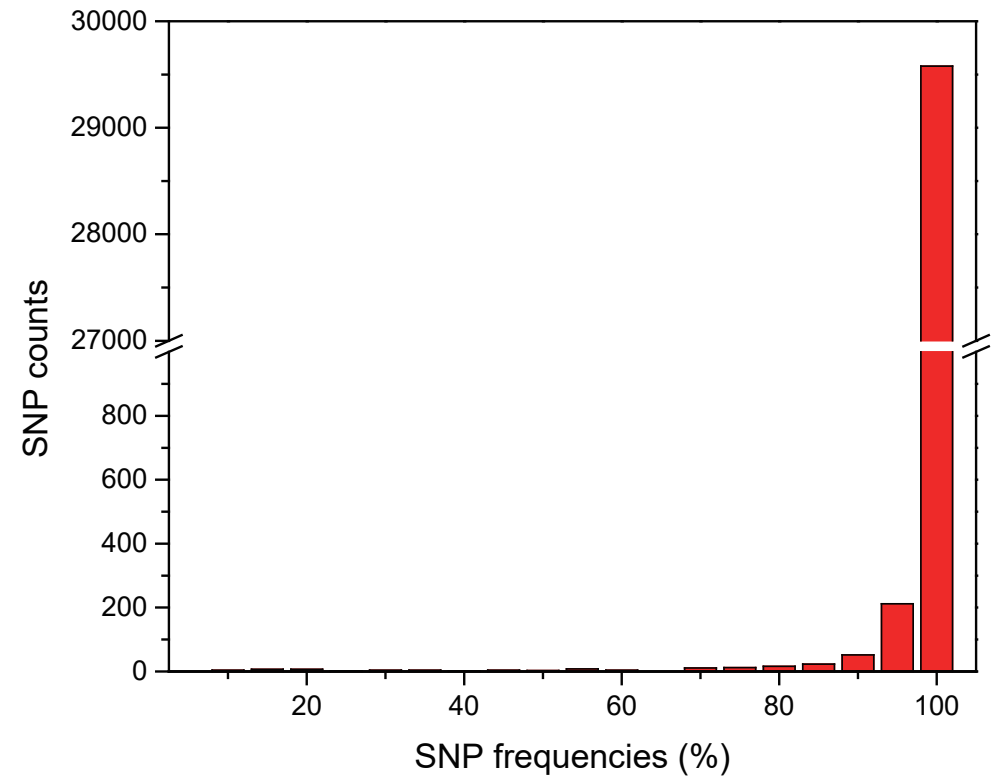

**Fig. S3. Conformation of culture purity with SEM and SNP profiling analyses. (A)** SEM image of pure culture LYY; **(B)** SNP profile of strain LYY. SNPs were called against the reference strain SZ. The sole peaks at 100% frequency of culture LYY suggest a single *Geobacter* strain.

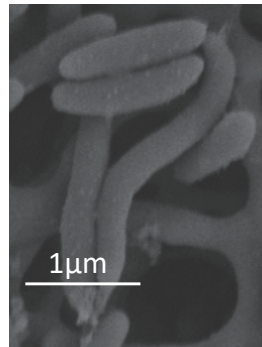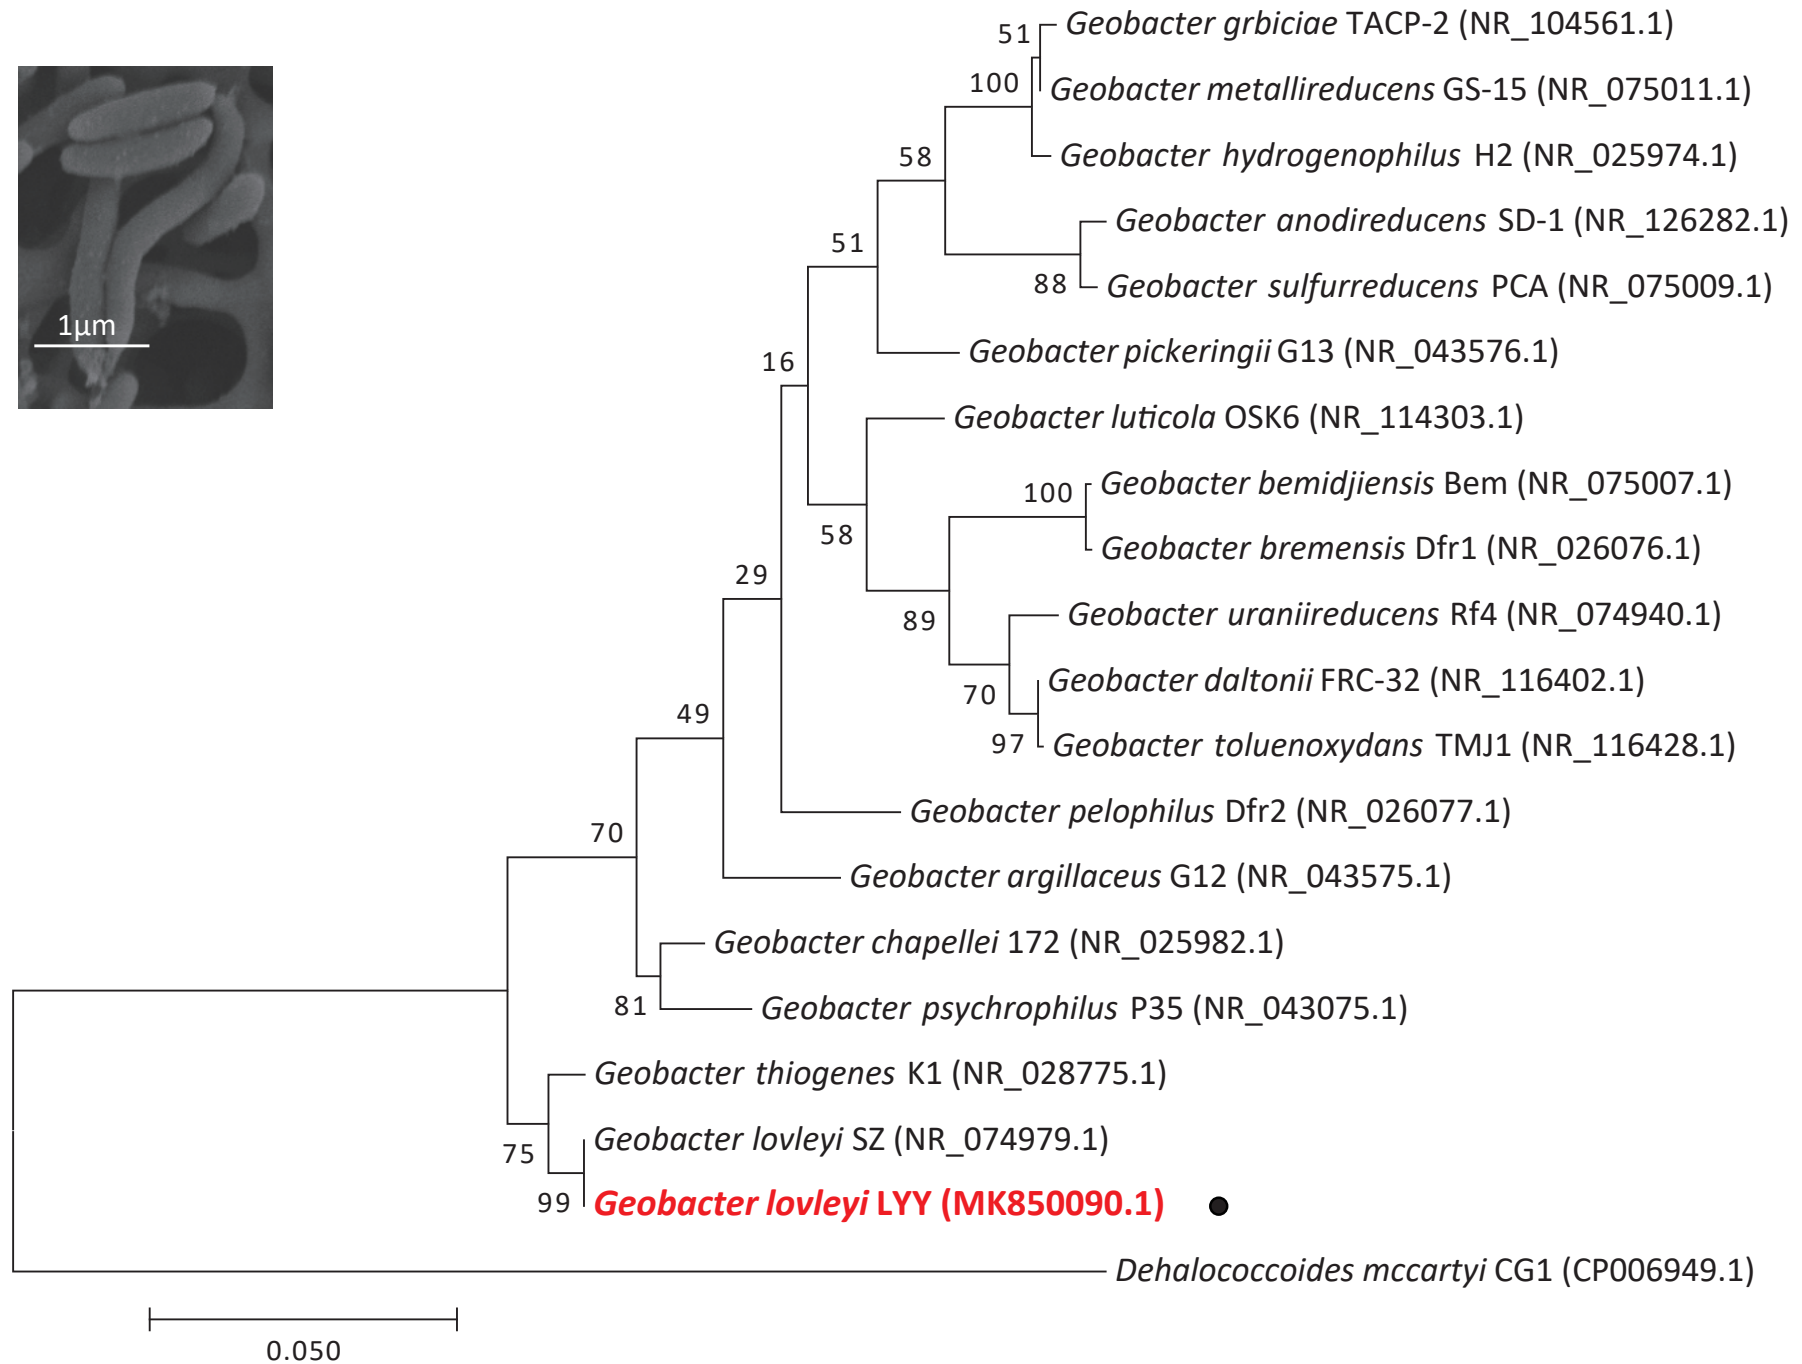

**Fig. S4. Phylogeny of *Geobacter lovleyi* LYY.** The phylogenetic tree of strain LYY and related strains has been constructed with neighbor-joining method (MEGA 7) based on their full-length 16S rRNA gene sequences. The bootstrap values at nodes are based on 1,000 replicates. The scale bar represents a 5-bp substitution per 100 nucleotides. A SEM image inside figure shows the cell morphology of *G. lovleyi* LYY.

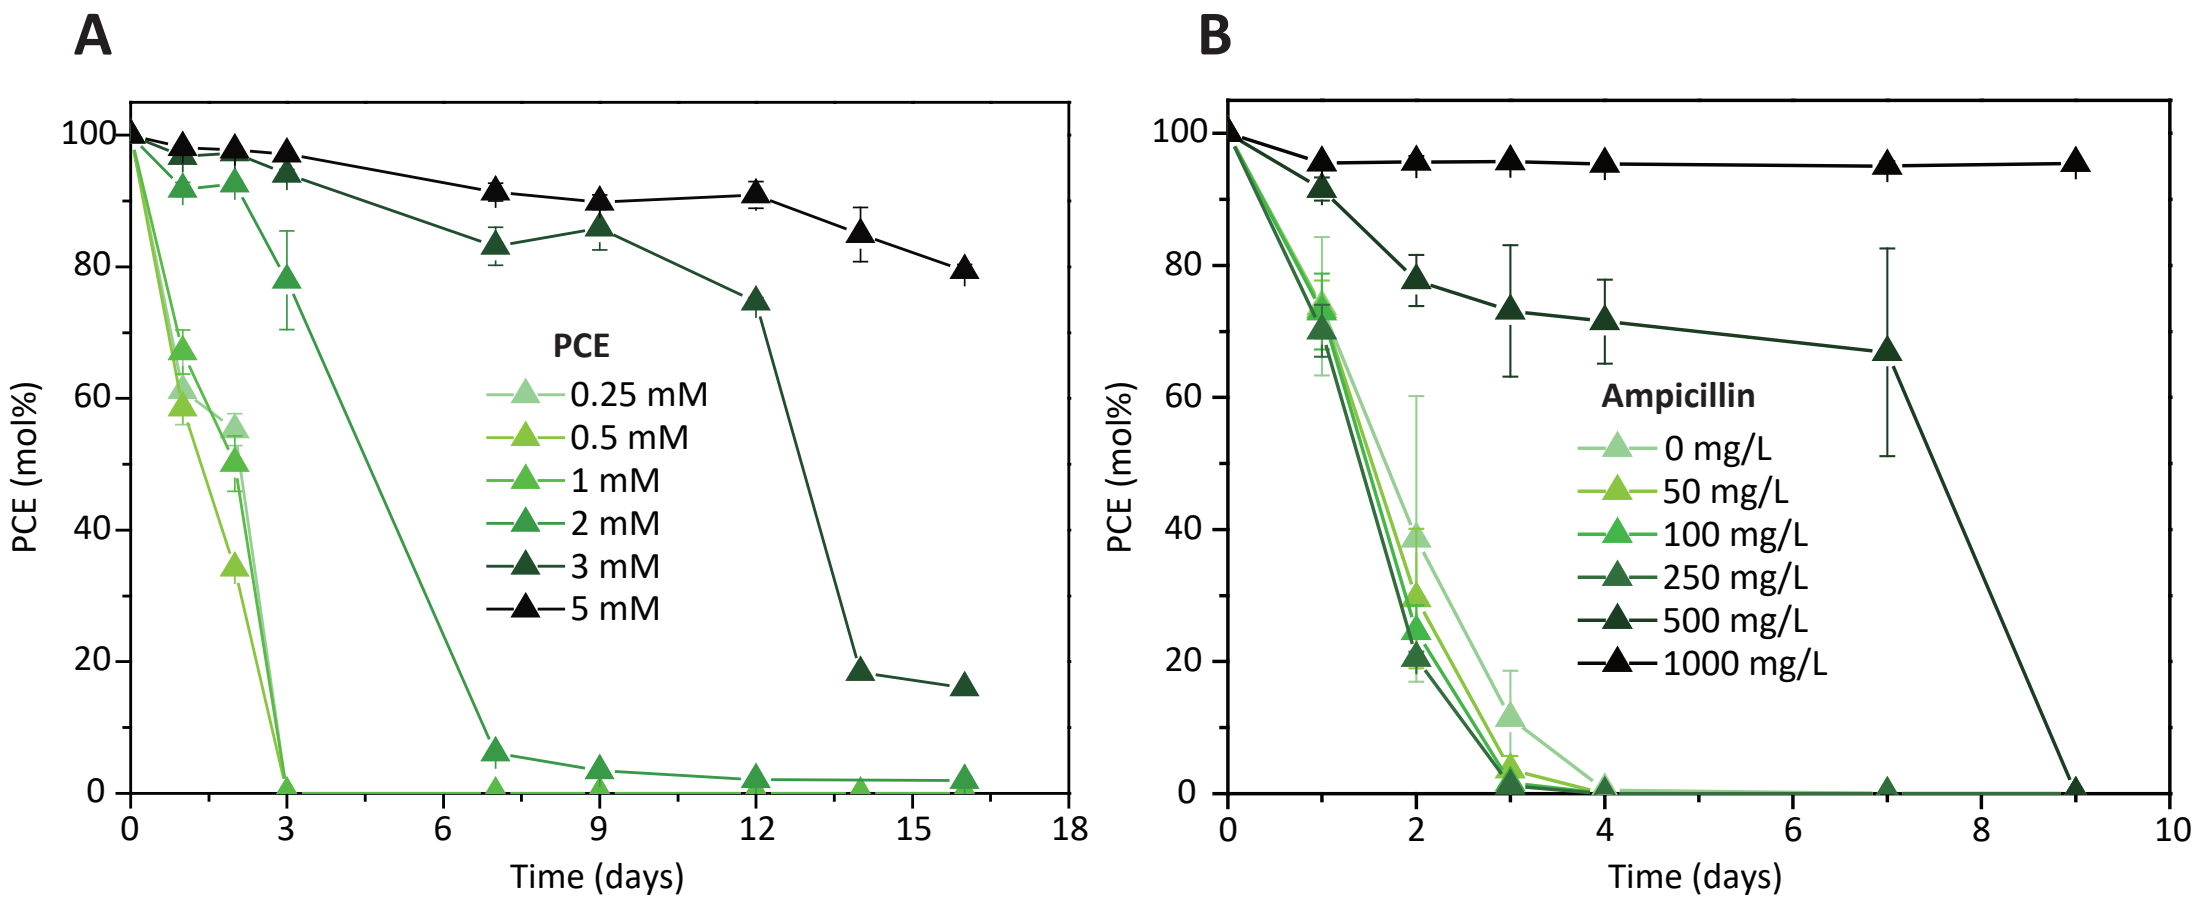

**Fig. S5 PCE dechlorination in *Geobacter lovleyi* LYY pure cultures. (A)** PCE-dechlorinating pure cultures fed with 0.25-5 mM PCE. **(B)** PCE-dechlorinating pure cultures amended with 0-1000 mg/L ampicillin and 1 mM PCE. Error bars represent SDs of triplicate cultures.

**A**

|                       | <i>G. lovleyi</i> |              | <i>G. thiogenes</i> | <i>G. sulfurreducens</i> |
|-----------------------|-------------------|--------------|---------------------|--------------------------|
|                       | <b>LYY</b>        | <b>SZ</b>    | <b>K1</b>           | <b>PCA</b>               |
| Size (Mb)             | 3.7               | 3.9          | 3.6                 | 3.8                      |
| G+C Content (%)       | 54.9              | 54.8         | 55.1                | 60.9                     |
| Genes (total)         | 3572              | 3726         | 3369                | 3490                     |
| CDSs (total)          | 3521              | 3672         | 3308                | 3432                     |
| tRNA                  | 42                | 44           | 48                  | 48                       |
| rRNA (5S, 16S, 23S)   | 2                 | 2            | 3                   | 2                        |
| <i>rdhA</i> genes     | 1                 | 2            | N.I.                | 0                        |
| Plasmid<br>(Size, bp) | 1<br>(81261)      | 1<br>(77113) | 0                   | 0                        |

N.I.: Not identified

**B**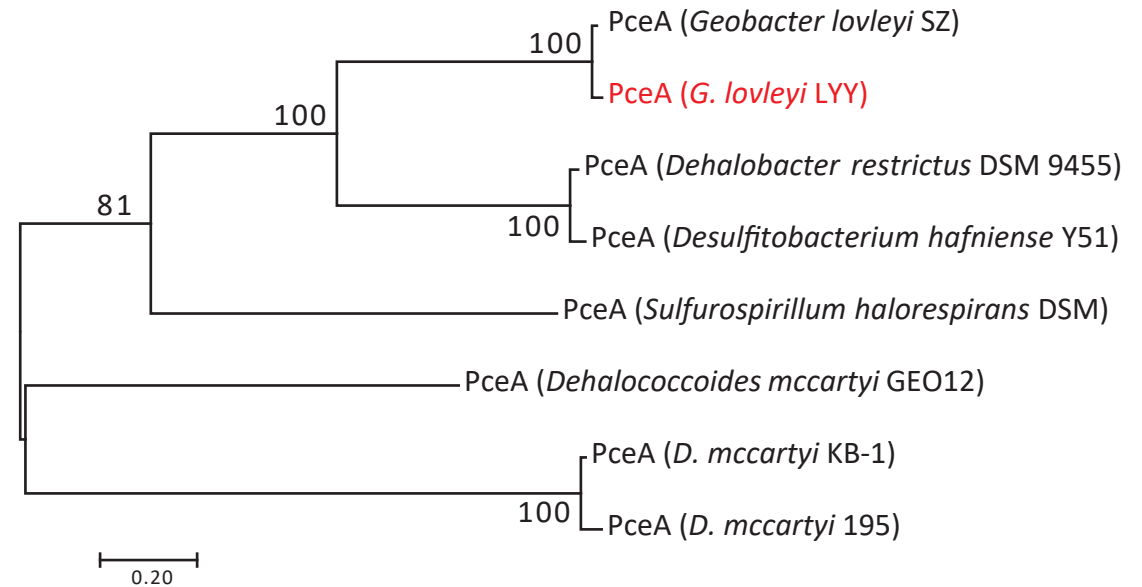**C****Strain LYY**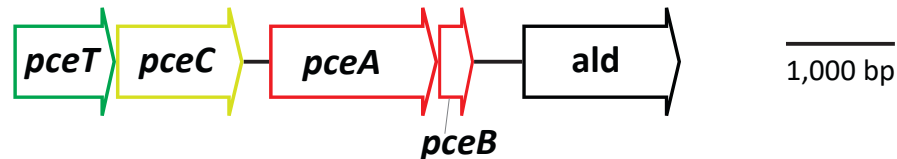**Strain SZ**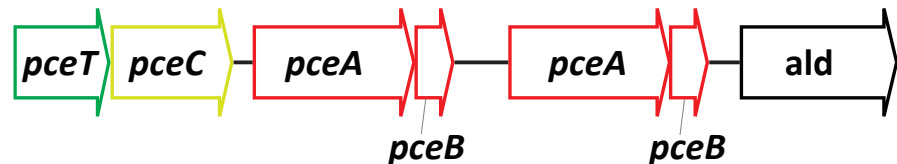

**Fig. S6. Genomic characterization of *Geobacter lovleyi* LYY.** (A) Overview of genomes of strain LYY and previously sequenced isolates (i.e., SZ, K1 and PCA) belonging to the *Geobacter* genus. (B) Phylogeny of PCE reductive dehalogenases (PceA) in OHRB of different lineages (*Geobacter lovleyi* SZ, WP\_012470907.1; *Dehalobacter restrictus* DSM 9455, CAD28792.1; *Desulfitobacterium hafniense* Y51, BAC00915.1; *Sulfurospirillum halorespirans* DSM, AHJ12791.1.; *Dehalococcoides mccartyi* GEO12, POZ59159.1; *D. mccartyi* KB-1, AQX75192.1; *D. mccartyi* 195, WP\_010936099.1). The tree has been generated for 550-aa aligned positions using Clustal W (MEGA 7), and bootstrap values at nodes are based on 1,000 replicates. The scale bar represents changes per amino acid position. (C) PCE reductive dehalogenase-encoding genomic loci on the chromosomes of *G. lovleyi* LYY and SZ.





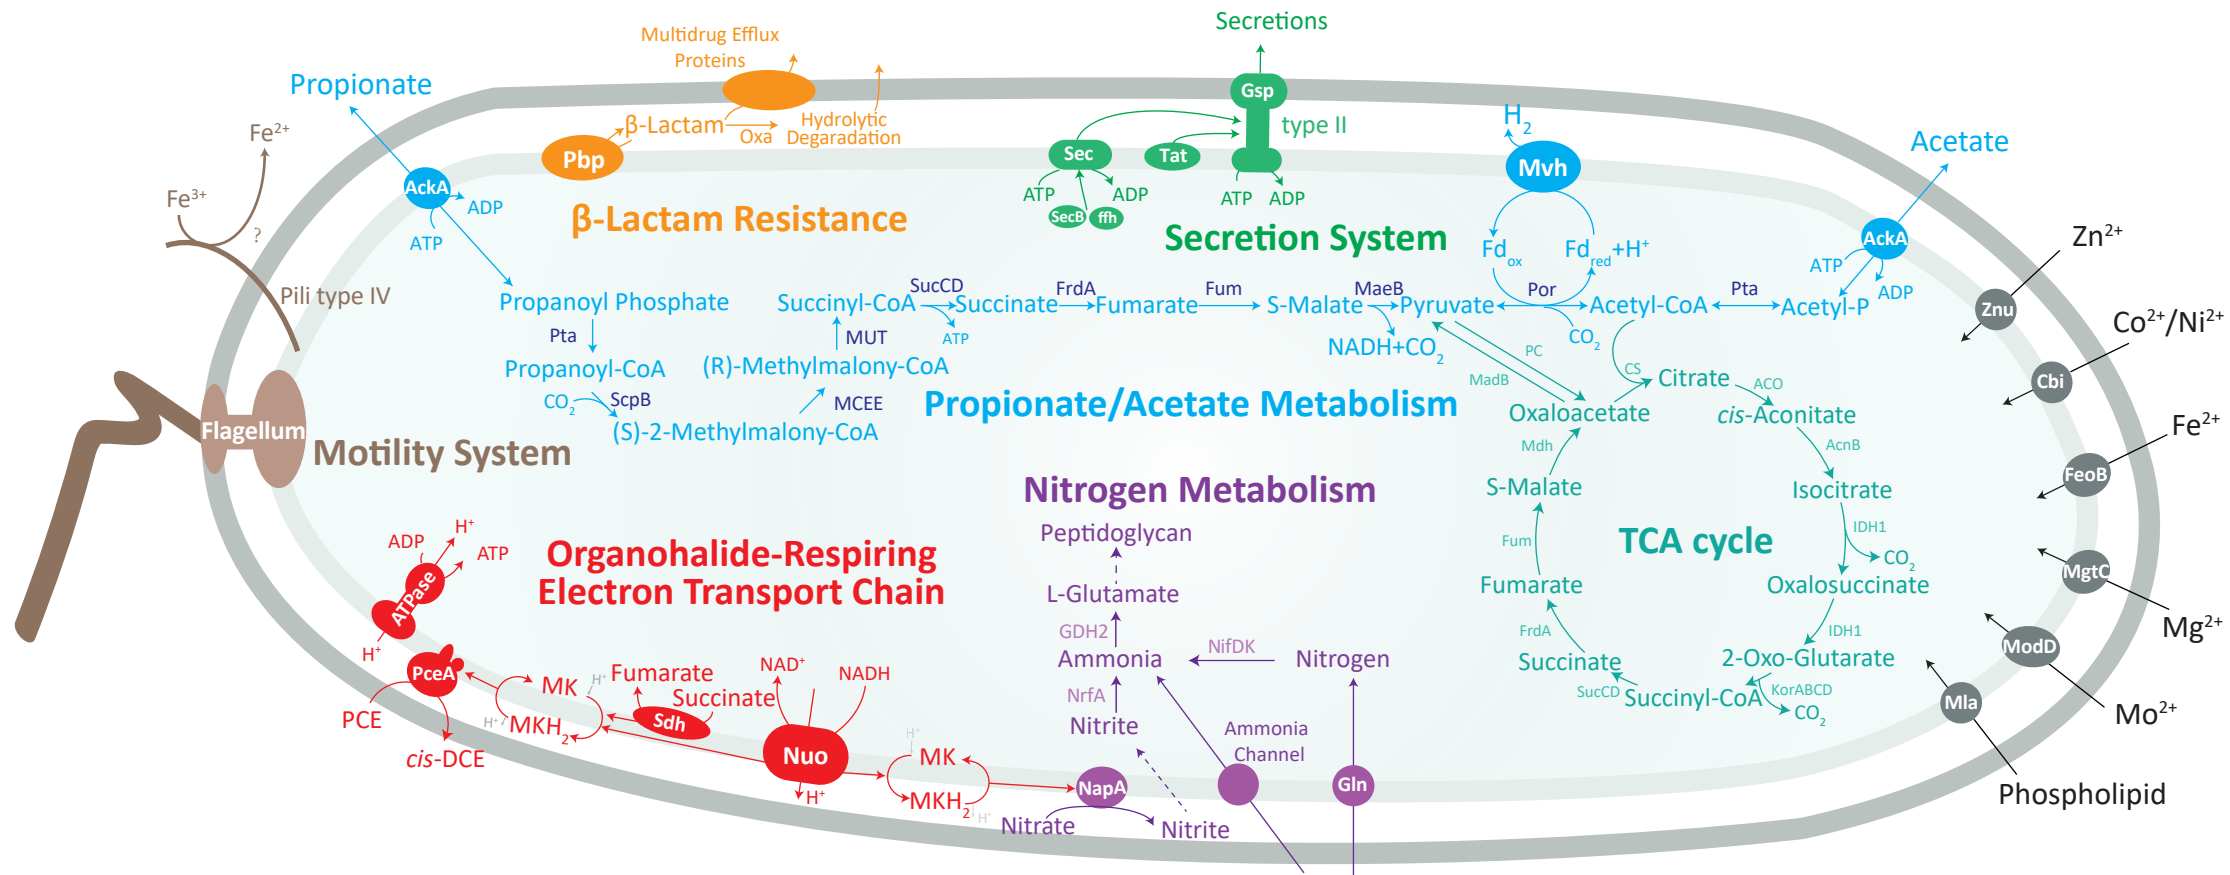

**Fig. S8. Predicted metabolic capabilities of *Geobacter lovleyi* LYY.** Metabolic pathways include organohalide-respiration (red), propionate-to-acetate/hydrogen metabolism (blue), TCA cycle (cyan) and nitrogen metabolism (purple), as well as type II secretion systems (orange) and β-lactam resistance (blue). See **Table S3** for detailed information on genes assigned to specific metabolic pathways.

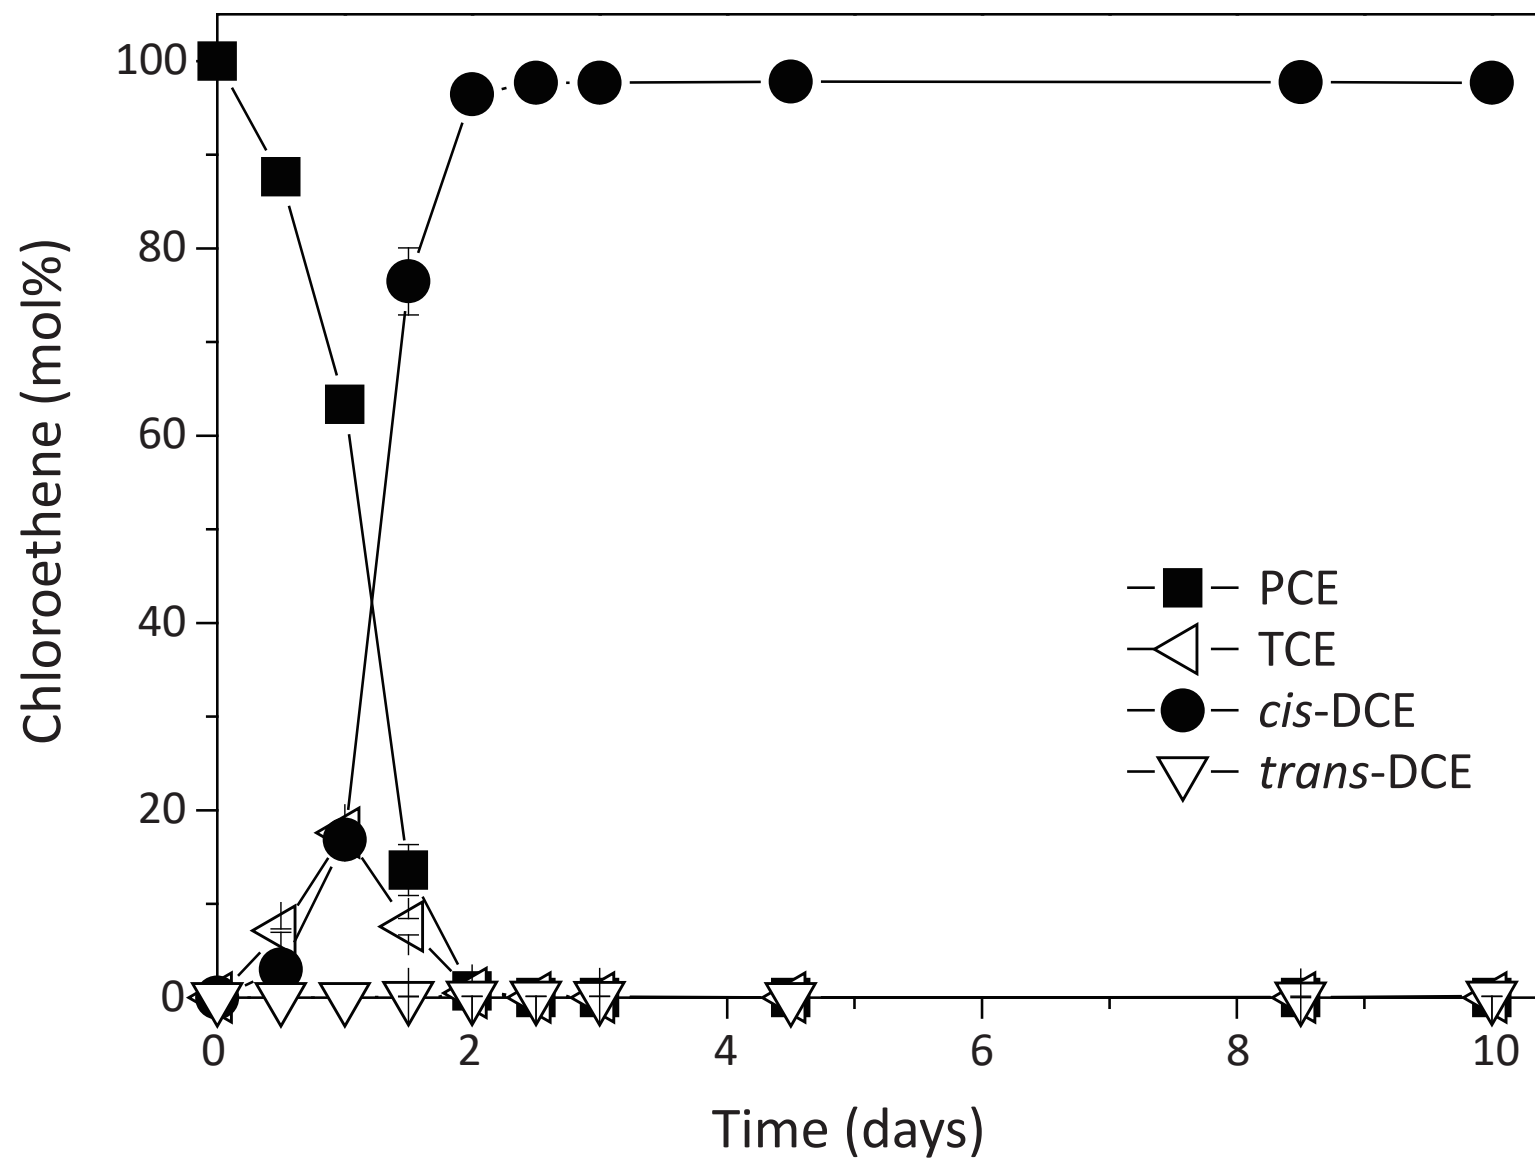

Fig. S9. PCE dechlorination in a *Geobacter-Dehalococcoides* co-culture. The coculture was prepared with *Geobacter lovleyi* LYY and *Dehalococcoides mccartyi* CG1.
