# Supplementary material for: Substrate-dependent competition and cooperation relationships between Geobacter and Dehalococcoides for their organohalide respiration
Source: PubMed Central journal article supplement (PMC9723705; doi:10.1038/s43705-021-00025-z), 2021-06-09
Supplement: 43705_2021_25_MOESM2_ESM.pdf [file 43705_2021_25_MOESM2_ESM.pdf]

Supplementary Tables for

**Substrate-dependent competition and cooperation relationships between *Geobacter* and *Dehalococcoides* for their organohalide respiration**

**Yongyi Liang<sup>1</sup>·Qihong Lu<sup>1</sup>·Zhiwei Liang<sup>1</sup>·Xiaokun Liu<sup>1</sup>·Wenwen Fang<sup>1</sup>·Dawei Liang<sup>2</sup>·Jialiang Kuang<sup>3</sup>·Rongliang Qiu<sup>1,4</sup>·Zhili He<sup>1</sup>·Shanquan Wang<sup>1\*</sup>**

<sup>1</sup> Environmental Microbiomics Research Center, School of Environmental Science and Engineering, Guangdong Provincial Key Laboratory of Environmental Pollution Control and Remediation Technology, Southern Marine Science and Engineering Guangdong Laboratory (Zhuhai), Sun Yat-Sen University, Guangzhou, China 510006

<sup>2</sup> Beijing Key Laboratory of Bio-inspired Energy Materials and Devices, School of Space & Environment, Beihang University, Beijing, China 100191

<sup>3</sup> Institute for Environmental Genomics and Department of Microbiology and Plant Biology, University of Oklahoma, Norman, OK, USA 73019

<sup>4</sup> Guangdong Laboratory for Lingnan Modern Agriculture, College of Natural Resources and Environment, South China Agricultural University, Guangzhou, China 510642

\*Corresponding author: Shanquan Wang ([wangshanquan@mail.sysu.edu.cn](mailto:wangshanquan@mail.sysu.edu.cn))

**Table S1.** Comparison of cell growth rate and yield of obligate and non-obligate PCE-dechlorinating OHRBs

| OHRBs        |                                          | Dechlorination products                  | Initial PCE concentration (mM) | Yield (cell numbers×10 <sup>8</sup> ·μmol Cl <sup>-1</sup> ) <sup>b</sup> |                      | References |
|--------------|------------------------------------------|------------------------------------------|--------------------------------|---------------------------------------------------------------------------|----------------------|------------|
|              |                                          |                                          |                                | Specific                                                                  | Average              |            |
| Obligate     | <i>Dehalococcoides mccartyi</i> 195      | VC, Ethene <sup>a</sup>                  | ~0.85                          | 2.9                                                                       | 1.252<br>(0.56-2.9)  | [1]        |
|              | <i>Dehalococcoides mccartyi</i> CBDB1    | <i>cis</i> -DCE, <i>trans</i> -DCE       | ~0.05                          | 1.3                                                                       |                      | [2]        |
|              | <i>Dehalococcoides mccartyi</i> 11a5     | <i>cis</i> -DCE, VC, Ethene <sup>a</sup> | ~0.60                          | 0.87                                                                      |                      | [3]        |
|              | <i>Dehalococcoides mccartyi</i> MB       | <i>cis</i> -DCE, <i>trans</i> -DCE       | ~0.50                          | 1                                                                         |                      | [4]        |
|              | <i>Dehalococcoides mccartyi</i> CG1      | <i>cis</i> -DCE, <i>trans</i> -DCE       | ~0.70                          | 1.2                                                                       |                      | [5]        |
|              | <i>Dehalococcoides mccartyi</i> CG4      | <i>cis</i> -DCE, <i>trans</i> -DCE       | ~0.70                          | 0.84                                                                      |                      | [5]        |
|              | <i>Dehalococcoides mccartyi</i> CG5      | <i>cis</i> -DCE, <i>trans</i> -DCE       | ~0.70                          | 0.97                                                                      |                      | [5]        |
|              | <i>Dehalococcoides mccartyi</i> JNA      | <i>cis</i> -DCE, <i>trans</i> -DCE       | ~0.70                          | 1.63                                                                      |                      | [6]        |
|              | <i>Dehalococcoides mccartyi</i> CG3      | <i>cis</i> -DCE, <i>trans</i> -DCE       | ~0.70                          | /                                                                         |                      | [7]        |
|              | <i>Dehalococcoides mccartyi</i> SG1      | <i>cis</i> -DCE, <i>trans</i> -DCE       | ~0.70                          | /                                                                         |                      | [7]        |
|              | <i>Dehalobacter restrictus</i> PER-K23   | <i>cis</i> -DCE                          | ~10.00                         | ~0.56                                                                     |                      | [8,9]      |
|              | <i>Dehalobacter restrictus</i> TEA       | <i>cis</i> -DCE                          | ~1.50                          | /                                                                         |                      | [10]       |
| Non-obligate | <i>Desulfitobacterium hafniense</i> TCE1 | <i>cis</i> -DCE                          | ~15.00                         | 0.55                                                                      | 0.386<br>(0.19-0.55) | [11]       |
|              | <i>Desulfitobacterium hafniense</i> Y51  | <i>cis</i> -DCE                          | 0.60                           | /                                                                         |                      | [12]       |
|              | <i>Desulfitobacterium hafniense</i> JH1  | <i>cis</i> -DCE                          | ~0.21                          | /                                                                         |                      | [13]       |
|              | <i>Desulfitobacterium sp.</i> KBC1       | TCE                                      | 0.30                           | /                                                                         |                      | [14]       |
|              | <i>Desulfitobacterium sp.</i> PCE1       | TCE                                      | 10.00                          | ~0.43                                                                     |                      | [15]       |
|              | <i>Sulfurospirillum multivorans</i> K    | <i>cis</i> -DCE                          | 0.36                           | ~0.47                                                                     |                      | [16]       |
|              | <i>Geobacter lovleyi</i> SZ              | <i>cis</i> -DCE                          | ~1.00                          | ~0.29                                                                     |                      | [17]       |
|              | <i>Desulfuromonas michiganensis</i> BB1  | <i>cis</i> -DCE                          | ~0.175                         | ~0.19                                                                     |                      | [18]       |

Note:

- a. reductive dechlorination of VC to ethene is considered to proceed in a cometabolic process
- b. cell yield, if no available data, were calculated according to the cell density and amounts of removed chlorines.

**Table S2.** Substrate characterization of *Geobacter lovleyi* LYY and comparison with other *Geobacter*

| <b>Electron donors</b>      | <b>strain LYY</b> | <b>strain SZ<sup>[19]</sup></b> | <b>strain K1<sup>[20]</sup></b> | <b>strain 172<sup>[21]</sup></b> | <b>strain P35<sup>[22]</sup></b> | <b>strain G12<sup>[23]</sup></b> | <b>strain Drf2<sup>[24]</sup></b> |
|-----------------------------|-------------------|---------------------------------|---------------------------------|----------------------------------|----------------------------------|----------------------------------|-----------------------------------|
| H <sub>2</sub> <sup>a</sup> | ×                 | √                               | √                               | ×                                | ×                                | ×                                | √                                 |
| Formate                     | ×                 | ×                               | ×                               | √                                | √                                | NA                               | √                                 |
| Acetate                     | √                 | √                               | √                               | √                                | √                                | √                                | √                                 |
| Propionate                  | √                 | ×                               | ×                               | ×                                | ×                                | NA                               | √                                 |
| Butyrate                    | ×                 | ×                               | ×                               | NA                               | ×                                | √                                | ×                                 |
| Lactate                     | ×                 | ×                               | ×                               | √                                | NA                               | √                                | ×                                 |
| Citrate                     | ×                 | ×                               | NA                              | NA                               | NA                               | NA                               | NA                                |
| Pyruvate                    | ×                 | √                               | ×                               | NA                               | √                                | √                                | √                                 |
| Glucose                     | ×                 | ×                               | NA                              | NA                               | NA                               | NA                               | NA                                |

  

| <b>Electron acceptors</b> | <b>strain LYY</b> | <b>strain SZ</b> | <b>strain K1</b> | <b>strain 172</b> | <b>strain P35</b> | <b>strain G12</b> | <b>strain Drf2</b> |
|---------------------------|-------------------|------------------|------------------|-------------------|-------------------|-------------------|--------------------|
| PCE                       | √                 | √                | NA               | NA                | NA                | NA                | NA                 |
| TCE                       | √                 | √                | NA               | NA                | NA                | NA                | NA                 |
| DCE                       | ×                 | ×                | NA               | NA                | NA                | NA                | NA                 |
| TCAc <sup>b</sup>         | NA                | NA               | √                | NA                | NA                | NA                | NA                 |
| Fe(III)                   | √                 | √                | √                | √                 | √                 | √                 | √                  |
| Nitrate                   | √                 | √                | √                | ×                 | ×                 | √                 | ×                  |
| Nitrite                   | ×                 | ×                | NA               | NA                | NA                | ×                 | ×                  |
| Sulfate                   | ×                 | ×                | ×                | NA                | ×                 | ×                 | ×                  |

Note: NA, Not Available  
 ×, no activity; √, active  
 a. Acetate (0.1mM) was provided as carbon source.  
 b. TCAc, Trichloroacetate.

**Table S3.** Genes assigned to specific metabolic pathways of *Geobacter lovleyi* LYY

| Locus        | Gene        | Definition                                                         | Metabolic pathway   |
|--------------|-------------|--------------------------------------------------------------------|---------------------|
| HHJ92_000201 | <i>acnB</i> | aconitate hydratase 2 / 2-methylisocitrate dehydratase             |                     |
| HHJ92_000525 | <i>sdhB</i> | succinate dehydrogenase / fumarate reductase, iron-sulfur subunit  |                     |
| HHJ92_000526 | <i>sdhA</i> | succinate dehydrogenase / fumarate reductase, flavoprotein subunit |                     |
| HHJ92_000527 | <i>sdhC</i> | succinate dehydrogenase / fumarate reductase, cytochrome b subunit |                     |
| HHJ92_001452 | <i>korC</i> | 2-oxoglutarate ferredoxin oxidoreductase subunit gamma             |                     |
| HHJ92_001453 | <i>korB</i> | 2-oxoglutarate/2-oxoacid ferredoxin oxidoreductase subunit beta    |                     |
| HHJ92_001452 | <i>korA</i> | 2-oxoglutarate/2-oxoacid ferredoxin oxidoreductase subunit alpha   |                     |
| HHJ92_001455 | <i>korD</i> | 2-oxoglutarate ferredoxin oxidoreductase subunit delta             |                     |
| HHJ92_001749 | <i>fumA</i> | fumarate hydratase class I                                         |                     |
| HHJ92_001851 | <i>sucC</i> | succinyl-CoA synthetase beta subunit                               | TCA cycle           |
| HHJ92_001852 | <i>sucD</i> | succinyl-CoA synthetase alpha subunit                              |                     |
| HHJ92_002285 | CS          | citrate synthase                                                   |                     |
| HHJ92_002385 | DLST        | 2-oxoglutarate dehydrogenase E2 component                          |                     |
| HHJ92_002386 | DLD         | dihydrolipoamide dehydrogenase                                     |                     |
| HHJ92_002387 | ACO         | aconitate hydratase                                                |                     |
| HHJ92_002440 | <i>frdA</i> | fumarate reductase flavoprotein subunit                            |                     |
| HHJ92_002566 | <i>fumC</i> | fumarate hydratase, class II                                       |                     |
| HHJ92_003386 | OGDH        | 2-oxoglutarate dehydrogenase                                       |                     |
| HHJ92_003396 | <i>mdh</i>  | malate dehydrogenase                                               |                     |
| HHJ92_003397 | IDH1        | isocitrate dehydrogenase                                           |                     |
| HHJ92_000074 | <i>ackA</i> | acetate kinase                                                     |                     |
| HHJ92_000201 | <i>acnB</i> | aconitate hydratase 2 / 2-methylisocitrate dehydratase             |                     |
| HHJ92_001303 | <i>mgsA</i> | methylglyoxal synthase                                             |                     |
| HHJ92_001402 | <i>gldA</i> | glycerol dehydrogenase                                             |                     |
| HHJ92_001533 | <i>acuI</i> | acrylyl-CoA reductase                                              |                     |
| HHJ92_001568 | <i>pta</i>  | phosphate acetyltransferase                                        |                     |
| HHJ92_001851 | <i>sucC</i> | succinyl-CoA synthetase beta subunit                               |                     |
| HHJ92_001852 | <i>sucD</i> | succinyl-CoA synthetase alpha subunit                              |                     |
| HHJ92_001858 | <i>accA</i> | acetyl-CoA carboxylase carboxyl transferase subunit alpha          | Propionate          |
| HHJ92_002284 | <i>scpB</i> | methylmalonyl-CoA decarboxylase                                    | /Acetate Metabolism |
| HHJ92_002372 | <i>accB</i> | acetyl-CoA carboxylase biotin carboxyl carrier protein             |                     |
| HHJ92_002372 | <i>accC</i> | acetyl-CoA carboxylase, biotin carboxylase subunit                 |                     |
| HHJ92_002386 | DLD         | dihydrolipoamide dehydrogenase                                     |                     |
| HHJ92_002701 | <i>pta</i>  | phosphate acetyltransferase                                        |                     |
| HHJ92_002727 | <i>accD</i> | acetyl-CoA carboxylase carboxyl transferase subunit beta           |                     |
| HHJ92_002930 | MCEE        | methylmalonyl-CoA/ethylmalonyl-CoA epimerase                       |                     |
| HHJ92_002933 | MUT         | methylmalonyl-CoA mutase                                           |                     |
| HHJ92_003112 | <i>yqhD</i> | NADP-dependent alcohol dehydrogenase                               |                     |
| HHJ92_000194 | <i>glnA</i> | glutamine synthetase                                               |                     |
| HHJ92_000315 | <i>cynT</i> | carbonic anhydrase                                                 |                     |
| HHJ92_001051 | <i>ncd2</i> | nitronate monooxygenase                                            | Nitrogen Metabolism |
| HHJ92_001259 | <i>gdhA</i> | glutamate dehydrogenase                                            |                     |
| HHJ92_001272 | <i>hcp</i>  | hydroxylamine reductase                                            |                     |

|              |              |                                                           |                     |
|--------------|--------------|-----------------------------------------------------------|---------------------|
| HHJ92_001335 | <i>nifK</i>  | nitrogenase molybdenum-iron protein beta chain            |                     |
| HHJ92_001336 | <i>nifD</i>  | nitrogenase molybdenum-iron protein alpha chain           |                     |
| HHJ92_001337 | <i>nifH</i>  | nitrogenase iron protein                                  |                     |
| HHJ92_001381 | GDH2         | glutamate dehydrogenase                                   |                     |
| HHJ92_001553 | <i>gltD</i>  | glutamate synthase (NADPH) small chain                    |                     |
| HHJ92_001554 | GLU          | glutamate synthase (ferredoxin)                           |                     |
| HHJ92_002538 | <i>nrfA</i>  | nitrite reductase                                         |                     |
| HHJ92_002539 | <i>nrfH</i>  | cytochrome c nitrite reductase small subunit              |                     |
| HHJ92_002541 | <i>hao</i>   | hydroxylamine dehydrogenase                               |                     |
| HHJ92_002553 | <i>napA</i>  | nitrate reductase                                         |                     |
| HHJ92_000663 | <i>mrda</i>  | penicillin-binding protein 2                              |                     |
| HHJ92_000994 | <i>acrA</i>  | membrane fusion protein, multidrug efflux system          |                     |
| HHJ92_001363 | <i>ftsI</i>  | cell division protein FtsI (penicillin-binding protein 3) |                     |
| HHJ92_001967 | <i>nagZ</i>  | beta-N-acetylhexosaminidase                               | β-Lactam Resistance |
| HHJ92_002005 | <i>mrcA</i>  | penicillin-binding protein 1A                             |                     |
| HHJ92_003105 | <i>oprM</i>  | outer membrane protein, multidrug efflux system           |                     |
| HHJ92_003106 | <i>acrB</i>  | multidrug efflux pump                                     |                     |
| HHJ92_003388 | <i>tolC</i>  | outer membrane protein                                    |                     |
| HHJ92_000020 | <i>tata</i>  | sec-independent protein translocase protein               |                     |
| HHJ92_000326 | <i>secF</i>  | preprotein translocase subunit                            |                     |
| HHJ92_000327 | <i>secD</i>  | preprotein translocase subunit SecD                       |                     |
| HHJ92_000328 | <i>yajC</i>  | preprotein translocase subunit                            |                     |
| HHJ92_000665 | <i>secA</i>  | preprotein translocase subunit                            |                     |
| HHJ92_000707 | <i>SPR54</i> | signal recognition particle subunit                       |                     |
| HHJ92_000788 | <i>gspE</i>  | general secretion pathway protein E                       |                     |
| HHJ92_002239 | <i>secE</i>  | preprotein translocase subunit SecE                       |                     |
| HHJ92_002272 | <i>secY</i>  | preprotein translocase subunit                            |                     |
| HHJ92_002732 | <i>tatC</i>  | sec-independent protein translocase protein               |                     |
| HHJ92_002763 | <i>gspM</i>  | general secretion pathway protein M                       |                     |
| HHJ92_002764 | <i>gspL</i>  | general secretion pathway protein L                       |                     |
| HHJ92_002765 | <i>gspK</i>  | general secretion pathway protein K                       | Secretion System    |
| HHJ92_002766 | <i>gspJ</i>  | general secretion pathway protein J                       |                     |
| HHJ92_002767 | <i>gspI</i>  | general secretion pathway protein I                       |                     |
| HHJ92_002768 | <i>gspH</i>  | general secretion pathway protein H                       |                     |
| HHJ92_002769 | <i>gspG</i>  | general secretion pathway protein G                       |                     |
| HHJ92_002770 | <i>gspF</i>  | general secretion pathway protein F                       |                     |
| HHJ92_002772 | <i>gspD</i>  | type II secretion system secretin                         |                     |
| HHJ92_002773 | <i>gspC</i>  | general secretion pathway protein C                       |                     |
| HHJ92_003163 | <i>secB</i>  | preprotein translocase subunit                            |                     |
| HHJ92_003169 | <i>ftsY</i>  | fused signal recognition particle receptor                |                     |
| HHJ92_003321 | <i>gidC</i>  | YidC/Oxa1 family membrane protein insertase               |                     |
| HHJ92_003388 | <i>tolC</i>  | outer membrane protein                                    |                     |
| HHJ92_003403 | <i>secG</i>  | preprotein translocase subunit                            |                     |
| HHJ92_001604 | <i>cysK</i>  | cysteine synthase                                         | Sulfur              |
| HHJ92_001606 | <i>metB</i>  | cystathionine gamma-synthase                              | Metabolism          |

|              |                  |                                                                                                    |                     |
|--------------|------------------|----------------------------------------------------------------------------------------------------|---------------------|
| HHJ92_001750 | <i>cysE</i>      | serine O-acetyltransferase                                                                         |                     |
| HHJ92_001797 | <i>ssuA</i>      | sulfonate transport system substrate-binding protein                                               |                     |
| HHJ92_002120 | <i>hydB</i>      | sulphydrogenase subunit beta (sulfur reductase)                                                    |                     |
| HHJ92_002122 | <i>hydG</i>      | sulphydrogenase subunit gamma (sulfur reductase)                                                   |                     |
| HHJ92_002225 | <i>mddA</i>      | methanethiol S-methyltransferase                                                                   |                     |
| HHJ92_002641 | <i>dmsB</i>      | dimethyl sulfoxide reductase iron-sulfur subunit                                                   |                     |
| HHJ92_002654 | <i>TST</i>       | thiosulfate/3-mercaptopyruvate sulfurtransferase                                                   |                     |
| HHJ92_002656 | <i>ttrB</i>      | tetrathionate reductase subunit B                                                                  |                     |
| HHJ92_002657 | <i>phsA</i>      | thiosulfate reductase / polysulfide reductase chain A                                              |                     |
| HHJ92_003019 | <i>dmsC</i>      | dimethyl sulfoxide reductase membrane subunit                                                      |                     |
| HHJ92_003151 | <i>metX</i>      | homoserine O-acetyltransferase/O-succinyltransferase                                               |                     |
| HHJ92_003350 | <i>nrnA</i>      | bifunctional oligoribonuclease and PAP phosphatase                                                 |                     |
| HHJ92_000503 | <i>bchE</i>      | anaerobic magnesium-protoporphyrin IX monomethyl ester cyclase                                     |                     |
| HHJ92_000615 | <i>ahbD</i>      | AdoMet-dependent heme synthase                                                                     |                     |
| HHJ92_000940 | <i>bfr</i>       | bacterioferritin                                                                                   |                     |
| HHJ92_001195 | <i>cobA-hemD</i> | uroporphyrinogen III methyltransferase / synthase                                                  |                     |
| HHJ92_001196 | <i>hemC</i>      | hydroxymethylbilane synthase                                                                       |                     |
| HHJ92_001197 | <i>hemA</i>      | glutamyl-tRNA reductase                                                                            |                     |
| HHJ92_001213 | PPOX             | protoporphyrinogen/coproporphyrinogen III oxidase                                                  |                     |
| HHJ92_001271 | EARS             | glutamyl-tRNA synthetase                                                                           |                     |
| HHJ92_001378 | <i>hemB</i>      | porphobilinogen synthase                                                                           |                     |
| HHJ92_001382 | <i>cobA</i>      | cob(I)alamin adenosyltransferase                                                                   |                     |
| HHJ92_001617 | <i>cobP</i>      | adenosylcobinamide kinase / adenosylcobinamide-phosphate guanylyltransferase                       |                     |
| HHJ92_001618 | <i>cobT</i>      | nicotinate-nucleotide--dimethylbenzimidazole phosphoribosyltransferase                             |                     |
| HHJ92_001619 | <i>cobS</i>      | adenosylcobinamide-GDP ribazoletransferase                                                         |                     |
| HHJ92_001620 | <i>cobC</i>      | alpha-ribazole phosphatase                                                                         |                     |
| HHJ92_002178 | <i>cobL</i>      | precorrin-6Y C5,15-methyltransferase (decarboxylating)                                             |                     |
| HHJ92_002179 | <i>cobK-cbiJ</i> | precorrin-6A/cobalt-precorrin-6A reductase                                                         |                     |
| HHJ92_002180 | <i>cbiG</i>      | cobalt-precorrin 5A hydrolase                                                                      | Cobalamin synthesis |
| HHJ92_002181 | <i>cbiG</i>      | cobalt-precorrin 5A hydrolase                                                                      |                     |
| HHJ92_002182 | <i>cobM</i>      | precorrin-4/cobalt-precorrin-4 C11-methyltransferase                                               |                     |
| HHJ92_002183 | <i>cbiD</i>      | cobalt-precorrin-5B (C1)-methyltransferase                                                         |                     |
| HHJ92_002184 | <i>cobI-cbiL</i> | precorrin-2/cobalt-factor-2 C20-methyltransferase                                                  |                     |
| HHJ92_002185 | <i>cbiK</i>      | sirohydrochlorin cobaltochelatase                                                                  |                     |
| HHJ92_002186 | <i>cobH-cbiC</i> | precorrin-8X/cobalt-precorrin-8 methylmutase                                                       |                     |
| HHJ92_002187 | <i>cobB-cbiA</i> | cobyric acid a,c-diamide synthase                                                                  |                     |
| HHJ92_002188 | <i>cysG</i>      | uroporphyrin-III C-methyltransferase / precorrin-2 dehydrogenase / sirohydrochlorin ferrochelatase |                     |
| HHJ92_002809 | <i>hemL</i>      | glutamate-1-semialdehyde 2,1-aminomutase                                                           |                     |
| HHJ92_002915 | <i>hemE</i>      | uroporphyrinogen decarboxylase                                                                     |                     |
| HHJ92_003063 | <i>hemN</i>      | oxygen-independent coproporphyrinogen III oxidase                                                  |                     |
| HHJ92_003225 | <i>cbiB</i>      | adenosylcobinamide-phosphate synthase                                                              |                     |
| HHJ92_003226 | <i>cobQ</i>      | adenosylcobyric acid synthase                                                                      |                     |
| HHJ92_003444 | <i>hemH</i>      | protoporphyrin/coproporphyrin ferrochelatase                                                       |                     |
| HHJ92_003533 | <i>cobN</i>      | cobaltochelatase                                                                                   |                     |
| HHJ92_000387 | <i>ppk</i>       | polyphosphate kinase                                                                               |                     |

|              |               |                                                                           |                                                           |
|--------------|---------------|---------------------------------------------------------------------------|-----------------------------------------------------------|
| HHJ92_000525 | <i>sdhB</i>   | succinate dehydrogenase / fumarate reductase, iron-sulfur subunit         |                                                           |
| HHJ92_000526 | <i>sdhA</i>   | succinate dehydrogenase / fumarate reductase, flavoprotein subunit        |                                                           |
| HHJ92_000527 | <i>sdhC</i>   | succinate dehydrogenase / fumarate reductase, cytochrome b subunit        |                                                           |
| HHJ92_000819 | <i>ppaC</i>   | manganese-dependent inorganic pyrophosphatase                             |                                                           |
| HHJ92_001671 | <i>hoxU</i>   | bidirectional [NiFe] hydrogenase diaphorase subunit                       |                                                           |
| HHJ92_001672 | <i>hoxF</i>   | bidirectional [NiFe] hydrogenase diaphorase subunit                       |                                                           |
| HHJ92_001673 | <i>hoxE</i>   | bidirectional [NiFe] hydrogenase diaphorase subunit                       |                                                           |
| HHJ92_002440 | <i>frdA</i>   | fumarate reductase flavoprotein subunit                                   |                                                           |
| HHJ92_002529 | <i>ndh</i>    | NADH dehydrogenase                                                        |                                                           |
| HHJ92_002687 | <i>MQCRB</i>  | menaquinol-cytochrome c reductase cytochrome b subunit                    |                                                           |
| HHJ92_002669 | <i>cydA</i>   | cytochrome bd ubiquinol oxidase subunit I                                 |                                                           |
| HHJ92_002700 | <i>cydB</i>   | cytochrome bd ubiquinol oxidase subunit II                                |                                                           |
| HHJ92_002795 | <i>nuoN</i>   | NADH-quinone oxidoreductase subunit N                                     |                                                           |
| HHJ92_002796 | <i>nuoM</i>   | NADH-quinone oxidoreductase subunit M                                     |                                                           |
| HHJ92_002797 | <i>nuoL</i>   | NADH-quinone oxidoreductase subunit L                                     |                                                           |
| HHJ92_002798 | <i>nuoK</i>   | NADH-quinone oxidoreductase subunit K                                     |                                                           |
| HHJ92_002799 | <i>nuoN</i>   | NADH-quinone oxidoreductase subunit N                                     |                                                           |
| HHJ92_002800 | <i>nuoI</i>   | NADH-quinone oxidoreductase subunit I                                     | Organohalide-<br>Respiring<br>Electron Transport<br>Chain |
| HHJ92_002801 | <i>nuoH</i>   | NADH-quinone oxidoreductase subunit H                                     |                                                           |
| HHJ92_002802 | <i>nuoG</i>   | NADH-quinone oxidoreductase subunit G                                     |                                                           |
| HHJ92_002803 | <i>nuoF</i>   | NADH-quinone oxidoreductase subunit F                                     |                                                           |
| HHJ92_002804 | <i>nuoE</i>   | NADH-quinone oxidoreductase subunit E                                     |                                                           |
| HHJ92_002805 | <i>nuoD</i>   | NADH-quinone oxidoreductase subunit D                                     |                                                           |
| HHJ92_002806 | <i>nuoC</i>   | NADH-quinone oxidoreductase subunit C                                     |                                                           |
| HHJ92_002807 | <i>nuoB</i>   | NADH-quinone oxidoreductase subunit B                                     |                                                           |
| HHJ92_002808 | <i>nuoA</i>   | NADH-quinone oxidoreductase subunit A                                     |                                                           |
| HHJ92_002812 | <i>ATPFOA</i> | F-type H <sup>+</sup> -transporting ATPase subunit a                      |                                                           |
| HHJ92_002813 | <i>ATPFOC</i> | F-type H <sup>+</sup> -transporting ATPase subunit c                      |                                                           |
| HHJ92_002839 | <i>ATPFIE</i> | F-type H <sup>+</sup> -transporting ATPase subunit epsilon                |                                                           |
| HHJ92_002840 | <i>ATPFIB</i> | F-type H <sup>+</sup> /Na <sup>+</sup> -transporting ATPase subunit beta  |                                                           |
| HHJ92_002841 | <i>ATPFIG</i> | F-type H <sup>+</sup> -transporting ATPase subunit gamma                  |                                                           |
| HHJ92_002842 | <i>ATPFIA</i> | F-type H <sup>+</sup> /Na <sup>+</sup> -transporting ATPase subunit alpha |                                                           |
| HHJ92_002843 | <i>ATPFID</i> | F-type H <sup>+</sup> -transporting ATPase subunit delta                  |                                                           |
| HHJ92_002844 | <i>ATPFOB</i> | F-type H <sup>+</sup> -transporting ATPase subunit b                      |                                                           |
| HHJ92_003483 | <i>pceB</i>   | membrane anchor protein subunit                                           |                                                           |
| HHJ92_003484 | <i>pceA</i>   | reductive dehalogenase                                                    |                                                           |
| HHJ92_003485 | <i>pceC</i>   | FMN-binding protein                                                       |                                                           |
| HHJ92_003486 | <i>pceT</i>   | FKBP-type peptidyl-prolyl cis-trans isomerase                             |                                                           |
| HHJ92_000868 | <i>motB</i>   | chemotaxis protein                                                        | Motility system                                           |
| HHJ92_000869 | <i>motA</i>   | chemotaxis protein                                                        |                                                           |
| HHJ92_001192 | <i>flgM</i>   | negative regulator of flagellin synthesis                                 |                                                           |
| HHJ92_002947 | <i>flgL</i>   | flagellar hook-associated protein 3                                       |                                                           |
| HHJ92_002948 | <i>flgK</i>   | flagellar hook-associated protein 1                                       |                                                           |
| HHJ92_002951 | <i>flgI</i>   | flagellar P-ring protein precursor                                        |                                                           |
| HHJ92_002952 | <i>flgH</i>   | flagellar L-ring protein precursor                                        |                                                           |

|              |              |                                                                               |              |
|--------------|--------------|-------------------------------------------------------------------------------|--------------|
| HHJ92_002953 | <i>flgA</i>  | flagella basal body P-ring formation protein                                  |              |
| HHJ92_002954 | <i>flgG</i>  | flagellar basal-body rod protein                                              |              |
| HHJ92_002956 | <i>fliA</i>  | RNA polymerase sigma factor for flagellar operon                              |              |
| HHJ92_002959 | <i>flhA</i>  | flagellar biosynthesis protein                                                |              |
| HHJ92_002960 | <i>flhB</i>  | flagellar biosynthetic protein                                                |              |
| HHJ92_002961 | <i>fliR</i>  | flagellar biosynthetic protein                                                |              |
| HHJ92_002962 | <i>fliQ</i>  | flagellar biosynthetic protein                                                |              |
| HHJ92_002963 | <i>fliP</i>  | flagellar biosynthetic protein                                                |              |
| HHJ92_002964 | <i>fliOZ</i> | flagellar protein                                                             |              |
| HHJ92_002965 | <i>fliNY</i> | flagellar motor switch protein                                                |              |
| HHJ92_002966 | <i>fliM</i>  | flagellar motor switch protein                                                |              |
| HHJ92_002968 | <i>flgE</i>  | flagellar hook protein                                                        |              |
| HHJ92_002970 | <i>flgD</i>  | flagellar basal-body rod modification protein                                 |              |
| HHJ92_002973 | <i>fliJ</i>  | flagellar FliJ protein                                                        |              |
| HHJ92_002974 | <i>fliI</i>  | flagellum-specific ATP synthase                                               |              |
| HHJ92_002975 | <i>fliH</i>  | flagellar assembly protein                                                    |              |
| HHJ92_002976 | <i>fliG</i>  | flagellar motor switch protein                                                |              |
| HHJ92_002977 | <i>fliF</i>  | flagellar M-ring protein                                                      |              |
| HHJ92_002978 | <i>fliE</i>  | flagellar hook-basal body complex protein                                     |              |
| HHJ92_002979 | <i>flgC</i>  | flagellar basal-body rod protein                                              |              |
| HHJ92_002980 | <i>flgB</i>  | flagellar basal-body rod protein                                              |              |
| HHJ92_003044 | <i>fliC</i>  | flagellin                                                                     |              |
| HHJ92_000146 | <i>znuA</i>  | zinc transport system substrate-binding protein                               |              |
| HHJ92_000147 | <i>znuC</i>  | zinc transport system ATP-binding protein                                     |              |
| HHJ92_000148 | <i>znuB</i>  | zinc transport system permease protein                                        |              |
| HHJ92_000688 | <i>feoB</i>  | ferrous iron transport protein B                                              |              |
| HHJ92_001141 | <i>modD</i>  | molybdenum transport protein                                                  |              |
| HHJ92_001899 | <i>cbiO</i>  | cobalt/nickel transport system ATP-binding protein                            |              |
| HHJ92_001900 | <i>cbiQ</i>  | cobalt/nickel transport system permease protein                               | Transporters |
| HHJ92_001901 | <i>cbiM</i>  | cobalt/nickel transport system permease protein                               |              |
| HHJ92_002224 | <i>mgtC</i>  | putative Mg <sup>2+</sup> transporter-C (MgtC) family protein                 |              |
| HHJ92_002851 | <i>mlaE</i>  | phospholipid/cholesterol/gamma-HCH transport system permease protein          |              |
| HHJ92_002852 | <i>mlaF</i>  | phospholipid/cholesterol/gamma-HCH transport system ATP-binding protein       |              |
| HHJ92_002853 | <i>mlaD</i>  | phospholipid/cholesterol/gamma-HCH transport system substrate-binding protein |              |
| HHJ92_002855 | <i>mlaC</i>  | phospholipid transport system substrate-binding protein                       |              |



**Table S4.** 86 predicted CDS in plasmid of *Geobacter lovleyi* LYY

| pLYY86 locus | Inferred/Annotated Function                                        | Length (bp) |
|--------------|--------------------------------------------------------------------|-------------|
| HHJ92_003487 | IS481-like element ISGlo3 family transposase                       | 978         |
| HHJ92_003488 | tautomerase                                                        | 399         |
| HHJ92_003489 | NADPH-dependent FMN reductase                                      | 627         |
| HHJ92_003490 | MTH865-like protein                                                | 237         |
| HHJ92_003491 | DUF1516 family protein                                             | 336         |
| HHJ92_003492 | TetR family transcriptional regulator, <i>comR1</i>                | 573         |
| HHJ92_003493 | hypothetical protein                                               | 408         |
| HHJ92_003494 | hypothetical protein                                               | 276         |
| HHJ92_003495 | 3-methyladenine DNA glycosylase                                    | 684         |
| HHJ92_003496 | TetR/AcrR family transcriptional regulator, <i>comR2</i>           | 567         |
| HHJ92_003497 | AhpC/TSA family protein, <i>bcpB</i>                               | 657         |
| HHJ92_003498 | hypothetical protein                                               | 249         |
| HHJ92_003499 | SDR family oxidoreductase                                          | 735         |
| HHJ92_003500 | carboxymuconolactone decarboxylase family protein                  | 552         |
| HHJ92_003501 | Flavodoxin family protein, <i>vrba</i>                             | 648         |
| HHJ92_003502 | DsbA oxidoreductase                                                | 648         |
| HHJ92_003503 | transcriptional regulator                                          | 315         |
| HHJ92_003504 | TPA addiction module protein                                       | 321         |
| HHJ92_003505 | DNA recombinase family protein, <i>hin</i>                         | 567         |
| HHJ92_003506 | Transposase Tn3                                                    | 2925        |
| HHJ92_003507 | hypothetical protein                                               | 231         |
| HHJ92_003508 | Tyrosine recombinase, <i>xerC1</i>                                 | 1014        |
| HHJ92_003509 | DNA breaking-rejoining enzymes C-terminal, <i>xerC2</i>            | 936         |
| HHJ92_003510 | hypothetical protein                                               | 225         |
| HHJ92_003511 | hypothetical protein                                               | 510         |
| HHJ92_003512 | hypothetical protein                                               | 705         |
| HHJ92_003513 | WGR domain-containing protein                                      | 255         |
| HHJ92_003514 | type II toxin-antitoxin system, <i>hipA</i>                        | 1245        |
| HHJ92_003515 | helix-trun-helix domain containing protein                         | 354         |
| HHJ92_003516 | HipA N-terminal domain protein                                     | 1212        |
| HHJ92_003517 | XRE family transcriptional regulator                               | 240         |
| HHJ92_003518 | class I SAM-dependent DNA methyltransferase                        | 2757        |
| HHJ92_003519 | DNA-binding protein HU 1, <i>hupA</i>                              | 282         |
| HHJ92_003520 | Cobyrinic acid ac-diamide synthase, <i>para</i>                    | 651         |
| HHJ92_003521 | hypothetical protein                                               | 423         |
| HHJ92_003522 | hypothetical protein                                               | 195         |
| HHJ92_003523 | Replication initiation protein, <i>repA</i>                        | 1113        |
| HHJ92_003524 | Integration host factor subunit alpha, <i>ihfA</i>                 | 294         |
| HHJ92_003525 | Cobyrinic acid synthase, <i>cobQ</i>                               | 2592        |
| HHJ92_003526 | Nicotinate-nucleotide—DMBA phosphoribosyltransferase, <i>cobT</i>  | 1053        |
| HHJ92_003527 | 5-hydroxybenzimidazole synthase, <i>bzaF</i>                       | 1311        |
| HHJ92_003528 | 3-hydroxy-5-methyl-1-naphthoate 3-O-methyltransferase, <i>crtF</i> | 1035        |
| HHJ92_003529 | TonB-dependent receptor, <i>cirA</i>                               | 2214        |
| HHJ92_003530 | DUF2162 domain-containing protein                                  | 702         |

|              |                                                                                    |      |
|--------------|------------------------------------------------------------------------------------|------|
| HHJ92_003531 | flageller motor protein, <i>motA</i>                                               | 597  |
| HHJ92_003532 | DUF2149 domain-containing protein                                                  | 339  |
| HHJ92_003533 | Aerobic cobaltochelatase subunit, <i>cobN</i>                                      | 4101 |
| HHJ92_003534 | Biopolymer transport protein, <i>exbB</i>                                          | 435  |
| HHJ92_003535 | iopolymer transport protein, <i>exbD</i>                                           | 384  |
| HHJ92_003536 | Protein <i>tonB</i>                                                                | 735  |
| HHJ92_003537 | Vitamin B12 transporter, <i>btuB</i>                                               | 1875 |
| HHJ92_003538 | IS5-like element ISGI04 family transposase                                         | 1329 |
| HHJ92_003539 | IS3-like element ISGI06 family transposase                                         | 750  |
| HHJ92_003540 | Macrolide export protein, <i>macA</i>                                              | 1032 |
| HHJ92_003541 | IS5-like transposase                                                               | 162  |
| HHJ92_003542 | hypothetical protein                                                               | 228  |
| HHJ92_003543 | Cobalt transport protein, <i>cbiM</i>                                              | 678  |
| HHJ92_003544 | Cobalt transport protein, <i>cbiN</i>                                              | 333  |
| HHJ92_003545 | Cobalt transport protein, <i>cbiQ</i>                                              | 729  |
| HHJ92_003546 | Energy-coupling factor transporter ATP-binding protein, <i>cbiO</i>                | 861  |
| HHJ92_003547 | Uroporphyrin-III C-methyltransferase, <i>cysG</i>                                  | 1413 |
| HHJ92_003548 | Cobyrinate a,c-diamide synthase, <i>cbiA</i>                                       | 1443 |
| HHJ92_003549 | Cobalt-precorrin-8 methylmutase, <i>cbiC</i>                                       | 687  |
| HHJ92_003550 | Sirohydrochlorin cobaltochelatase, <i>cbiK</i>                                     | 786  |
| HHJ92_003551 | Cobalt-precorrin-2 C(20)-methyltransferase, <i>cbiI</i>                            | 738  |
| HHJ92_003552 | Cobalt-precorrin-5B C(1)-methyltransferase, <i>cbiD</i>                            | 1077 |
| HHJ92_003553 | Cobalt-precorrin-4 C(11)-methyltransferase, <i>cbiF/cobM</i>                       | 759  |
| HHJ92_003554 | Cobalt-precorrin-5A hydrolase, <i>cbiG</i>                                         | 780  |
| HHJ92_003555 | putative cobalt-factor III C(17)-methyltransferase, <i>cobJ/cbiH</i>               | 669  |
| HHJ92_003556 | Cobalt-precorrin-6A reductase, <i>cbiJ/cobK</i>                                    | 786  |
| HHJ92_003557 | Cobalamin biosynthesis bifunctional protein, <i>cbiE</i>                           | 618  |
| HHJ92_003558 | (S)-2-haloacid dehalogenase type II                                                | 687  |
| HHJ92_003559 | Crp/Fnr family transcriptional regulator                                           | 711  |
| HHJ92_003560 | NADPH-dependent FMN reductase, <i>wrbA</i>                                         | 642  |
| HHJ92_003561 | Ribosomal small subunit-dependent GTPase A                                         | 1002 |
| HHJ92_003562 | hypothetical protein                                                               | 291  |
| HHJ92_003563 | 5-methyltetrahydropteroyltriglutamate-homocysteine<br>methyltransferase            | 1002 |
| HHJ92_003564 | 2-oxoglutarate oxidoreductase subunit, <i>korA</i>                                 | 1854 |
| HHJ92_003565 | 2-oxoglutarate oxidoreductase subunit, <i>korB</i>                                 | 1002 |
| HHJ92_003566 | Cob(I)yrinic acid a,c-diamide adenosyltransferase, <i>btuR</i>                     | 663  |
| HHJ92_003567 | Hca operon transcriptional activator, <i>lysR</i>                                  | 867  |
| HHJ92_003568 | P-loop_NTPase transposase                                                          | 1572 |
| HHJ92_003569 | IS5376 putative ATP-binding protein                                                | 762  |
| HHJ92_003570 | Diacetyl reductase [(S)-acetoin forming] SDR family<br>oxidoreductase, <i>budC</i> | 735  |
| HHJ92_003571 | 2-hydroxychromene-2-carboxylate isomerase, <i>dsbA</i>                             | 588  |
| HHJ92_003572 | hypothetical protein                                                               | 588  |

**Table S5.** Gibbs free energy of propionate and acetate transformation

| <b>Reaction</b>                                                                                                              | <b><math>\Delta G^0</math> (kJ/mol)</b> | <b>Reference</b> |
|------------------------------------------------------------------------------------------------------------------------------|-----------------------------------------|------------------|
| Propionate <sup>-</sup> + 2H <sub>2</sub> O → Acetate <sup>-</sup> + CO <sub>2</sub> + 3H <sub>2</sub>                       | +76.0                                   | [25]             |
| Propionate <sup>-</sup> + 2H <sub>2</sub> O + 2CO <sub>2</sub> → Acetate <sup>-</sup> + 3HCOO <sup>-</sup> + 3H <sup>+</sup> | +65.3                                   | [25]             |
| Propionate <sup>-</sup> + 7H <sub>2</sub> O → 3HCO <sub>3</sub> <sup>-</sup> + 7H <sub>2</sub> + 2H <sup>+</sup>             | +181.1                                  | [25]             |
| PCE + H <sub>2</sub> → TCE + H <sup>+</sup> + Cl <sup>-</sup>                                                                | -173.4                                  | [26]             |
| PCB180 + H <sub>2</sub> → PCB153 + H <sup>+</sup> + Cl <sup>-</sup>                                                          | -115.3                                  | [27]             |

**Table S6.** Environmental distribution of *Dehalococcoides* and *Geobacter*

| Type of samples       | Samples Description                                            | Relative Abundance (%) <sup>a</sup>                    |                                             | References |
|-----------------------|----------------------------------------------------------------|--------------------------------------------------------|---------------------------------------------|------------|
|                       |                                                                | <i>Dehalococcoides</i> or<br><i>Dehalococcoidaceas</i> | <i>Geobacter</i> or<br><i>Geobcteraceae</i> |            |
| Core soil samples     | The open burning site of e-waste recycling village             | 0.08                                                   | 0.68                                        | [28]       |
| Core soil samples     | The adjacent farmland site of e-waste recycling village        | 0.08                                                   | 2.19                                        | [28]       |
| Core sediment samples | The stream site near e-waste recycling village                 | 0.43                                                   | 1.54                                        | [28]       |
| Soil and groundwater  | A local industrial area, with chlorinated ethenes contaminated | 0.00                                                   | 5.00                                        | [29]       |
| Soil samples          | Remedial investigation well of high TCE concentration site     | 0.00                                                   | ~1.02                                       | [30]       |
| Biowall samples       | Biowall with low/moderate TCE contamination                    | ~0.04                                                  | ~1.30                                       | [30]       |
| Biowall samples       | Biowall with high TCE contamination                            | ~0.04                                                  | ~2.26                                       | [30]       |
| Biowall samples       | Biowall with moderate TCE contamination                        | ~0.05                                                  | ~1.64                                       | [30]       |
| Groundwater samples   | An industrial park site with PCE/TCE contaminated              | 0.00                                                   | 6.37                                        | [31]       |
| Sediment samples      | Emergency wastewater overflow lagoon with PCB-contaminated     | 0.02-0.36                                              | 0.01-3.8                                    | [32]       |
| Sediment samples      | Houston Ship Channel                                           | 1.00                                                   | 2.00                                        | [33]       |
| Sediment sample       | Wastewater lagoon contaminated with PCBs A1                    | 0.10                                                   | 0.30                                        | [34]       |
| Sediment sample       | A2                                                             | 0.05                                                   | 3.80                                        | [34]       |
| Sediment sample       | A3                                                             | 0.07                                                   | 1.10                                        | [34]       |
| Sediment sample       | A4                                                             | 0.20                                                   | 1.00                                        | [34]       |
| Sediment sample       | A5                                                             | 0.08                                                   | 1.30                                        | [34]       |
| Sediment sample       | B1                                                             | 0.12                                                   | 2.00                                        | [34]       |
| Sediment sample       | B2                                                             | 0.08                                                   | 0.40                                        | [34]       |
| Sediment sample       | B3                                                             | 0.02                                                   | 0.25                                        | [34]       |
| Sediment sample       | B4                                                             | 0.11                                                   | 0.70                                        | [34]       |
| Sediment sample       | B5                                                             | 0.07                                                   | 0.10                                        | [34]       |
| Sediment sample       | C1                                                             | 0.08                                                   | 0.15                                        | [34]       |
| Sediment sample       | C2                                                             | 0.13                                                   | 1.20                                        | [34]       |
| Sediment sample       | C3                                                             | 0.03                                                   | 0.20                                        | [34]       |
| Sediment sample       | C4                                                             | 0.02                                                   | 0.05                                        | [34]       |
| Sediment sample       | C5                                                             | 0.17                                                   | 1.10                                        | [34]       |
| Sediment sample       | D1                                                             | 0.09                                                   | 0.20                                        | [34]       |
| Sediment sample       | D2                                                             | 0.10                                                   | 0.10                                        | [34]       |
| Sediment sample       | D3                                                             | 0.07                                                   | 0.40                                        | [34]       |
| Sediment sample       | D4                                                             | 0.18                                                   | 0.50                                        | [34]       |
| Sediment sample       | D5                                                             | 0.02                                                   | 0.08                                        | [34]       |
| Sediment sample       | E1                                                             | 0.03                                                   | 0.05                                        | [34]       |
| Sediment sample       | E2                                                             | 0.05                                                   | 0.30                                        | [34]       |
| Sediment sample       | E3                                                             | 0.03                                                   | 0.10                                        | [34]       |
| Sediment sample       | E4                                                             | 0.07                                                   | 0.40                                        | [34]       |
| Sediment sample       | E5                                                             | 0.35                                                   | 1.10                                        | [34]       |
| Sediment sample       | F3                                                             | 0.03                                                   | 1.20                                        | [34]       |

|                           |                                                   |      |       |      |
|---------------------------|---------------------------------------------------|------|-------|------|
| <b>Sediment sample</b>    | F4                                                | 0.02 | 3.70  | [34] |
| <b>Sediment sample</b>    | River sediment                                    | 0.05 | 1.80  | [35] |
| <b>Groundwater sample</b> | PCE contaminated groundwater P2-C3                | 0.22 | 0.56  | [36] |
| <b>Groundwater sample</b> | P2-C4                                             | 0.40 | 1.14  | [36] |
| <b>Groundwater sample</b> | P2-C5                                             | 0.07 | 0.10  | [36] |
| <b>Groundwater sample</b> | P3-C3                                             | 1.48 | 2.55  | [36] |
| <b>Groundwater sample</b> | P3-C4                                             | 1.82 | 3.91  | [36] |
| <b>Groundwater sample</b> | TCE contaminated groundwater S1                   | 0.01 | 0.80  | [37] |
| <b>Groundwater sample</b> | groundwater N5                                    | 0.01 | 0.16  | [37] |
| <b>Sediment sample</b>    | PCB contaminated sediment MIDNA                   | 0.08 | 0.34  | [38] |
| <b>Sediment sample</b>    | sediment L1                                       | 0.55 | 3.55  | [39] |
| <b>Sediment sample</b>    | sediment L2                                       | 0.18 | 3.85  | [39] |
| <b>Sediment sample</b>    | sediment L3                                       | 2.22 | 0.07  | [39] |
| <b>Groundwater sample</b> | Chlorinated solvent contaminated groundwater MW35 | 0.50 | 4.40  | [40] |
| <b>Groundwater sample</b> | MW113                                             | 0.30 | 3.00  | [40] |
| <b>Groundwater sample</b> | MW514                                             | 0.30 | 1.80  | [40] |
| <b>Groundwater sample</b> | MW2                                               | 1.00 | 7.50  | [40] |
| <b>Groundwater sample</b> | MW3                                               | 0.80 | 10.00 | [40] |
| <b>Groundwater sample</b> | MW4                                               | 0.40 | 6.20  | [40] |
| <b>Groundwater sample</b> | IW3                                               | 2.00 | 14.00 | [40] |
| <b>Groundwater sample</b> | IW4                                               | 1.80 | 17.50 | [40] |
| <b>Groundwater sample</b> | IW6                                               | 3.80 | 8.00  | [40] |
| <b>Groundwater sample</b> | MW114                                             | 0.12 | 1.00  | [40] |
| <b>Groundwater sample</b> | MW303S                                            | 0.20 | 1.80  | [40] |
| <b>Groundwater sample</b> | IW5                                               | 0.50 | 2.30  | [40] |
| <b>Groundwater sample</b> | IW7                                               | 0.52 | 1.80  | [40] |
| <b>Groundwater sample</b> | MW38                                              | 0.50 | 2.00  | [40] |
| <b>Groundwater sample</b> | MW40                                              | 0.65 | 3.00  | [40] |
| <b>Soil sample</b>        | Chlorinated ethenes contaminated soil MV-1        | 0.10 | 0.00  | [41] |
| <b>Soil sample</b>        | MV-2                                              | 1.94 | 0.00  | [41] |
| <b>Soil sample</b>        | MV-3                                              | 1.02 | 0.00  | [41] |
| <b>Groundwater sample</b> | Chloroethene contaminated groundwater             | 0.10 | 1.70  | [42] |

Note: a, the data was calculated based on the 16S rRNA sequencing analysis

## References:

- [1] Maymo-Gatell X, Chien XY, Gossett JM, Zinder SH. 1997. Isolation of a bacterium that reductively dechlorinates tetrachloroethene to ethene. *Science*. 276:1568–1571.
- [2] Marco-Urrea E, Nijenhuis I, Adrian L. 2011. Transformation and carbon isotope fractionation of tetra- and trichloroethene to trans-dichloroethene by *Dehalococcoides* sp. strain CBDB1. *Environ Sci Technol*. 45:1555–1562.
- [3] Zhao, S, Ding, C, He, J, 2016. Genomic characterization of *Dehalococcoides mccartyi* strain 11a5 reveals a circular extrachromosomal genetic element and a new tetrachloroethene reductive dehalogenase, *FEMS Microbiol Ecol* 94, fiw235.
- [4] Cheng D, He JZ. 2009. Isolation and characterization of “*Dehalococcoides*” sp. strain MB, which dechlorinates tetrachloroethene to trans-1,2-dichloroethene. *Appl Environ Microbiol*. 75:5910–5918.
- [5] Wang S, Chng KR, Wilm A, Zhao S, Yang KL, Nagarajan N, He J. 2014. Genomic characterization of three unique *Dehalococcoides* that respire on persistent polychlorinated biphenyls. *Proc Natl Acad Sci USA*. 111:12103–12108.
- [6] Wang S, Chng K R, Chen C, Bedard D L, He J. 2015. Genomic characterization of *Dehalococcoides mccartyi* strain JNA that reductively dechlorinates tetrachloroethene and polychlorinated biphenyls. *Environ. Sci. Technol*. 49:14319-14325.
- [7] Wang S, Chen C, Siyan Z, Jianzhong H. 2019. Microbial synergistic interactions for reductive dechlorination of polychlorinated biphenyls. *Science of Total Environment*. 666: 368-376.
- [8] Holliger C, Schraa G, Stams AJM, Zehnder AJB. 1993. A highly purified enrichment culture couples the reductive dechlorination of tetrachloroethene to growth. *Appl Environ Microbiol*. 59:2991–2997.
- [9] Holliger C, Hahn D, Harmsen H, Ludwig W, Schumacher W, Tindall B, Vazquez F, Weiss N, Zehnder A J. 1998. *Dehalobacter restrictus* gen. nov. and sp. nov., a strictly anaerobic bacterium that reductively dechlorinates tetra- and trichloroethene in an anaerobic respiration. *Arch Microbiol*. 169:313-321.
- [10] Wild A, Hermann R, Leisinger T. 1996. Isolation of an anaerobic bacterium which reductively dechlorinates tetrachloroethene and trichloroethene. *Biodegradation*. 7:507–511.
- [11] Gerritse J, Drzyzga O, Kloetstra G, Keijmel M, Wiersum LP, Hutson R, Collins MD, Gottschal JC. 1999. Influence of different electron donors and acceptors on dehalorespiration of tetrachloroethene by *Desulfitobacterium frappieri* TCE1. *Appl Environ Microbiol*. 65:5212–5221.
- [12] Suyama A, Iwakiri R, Kai K, Tokunaga T, Sera N, Furukawa K. 2001. Isolation and characterization of *Desulfitobacterium* sp strain Y51 capable of efficient dehalogenation of tetrachloroethene and polychloroethanes. *Biosci Biotechnol Biochem*. 65:1474–1481.
- [13] Fletcher KE, Ritalahti KM, Pennell KD, Takamizawa K, Löffler FE. 2008. Resolution of culture *Clostridium bifermentans* DPH-1 into two populations, a *Clostridium* sp. and tetrachloroethene-dechlorinating *Desulfitobacterium hafniense* strain JH1. *Appl Environ Microbiol* 74:6141–6143.
- [14] Tsukagoshi N, Ezaki S, Uenaka T. 2006. Isolation and transcriptional analysis of novel tetrachloroethene reductive dehalogenase gene from *Desulfitobacterium* sp. strain KBC1. *Appl Microbiol Biotechnol*. 69:543–553.
- [15] Gerritse J, Renard V, Pedro Gomes TM, Lawson PA, Collins MD, Gottschal JC. 1996. *Desulfitobacterium* sp. strain PCE1, an anaerobic bacterium that can grow by reductive dechlorination of tetrachloroethene or ortho-chlorinated phenols. *Arch Microbiol*. 165:132–140.
- [16] Scholz-Muramatsu H, Neumann A, Messmer M, Moore E, Diekert G. 1995. Isolation and characterization of *Dehalospirillum multivorans* gen. nov., sp. nov., a tetrachloroethene-utilizing, strictly anaerobic bacterium. *Arch Microbiol*. 163:48–56.
- [17] Sung Y, Fletcher K, Ritalahti KM, Apkarian RP, Ramos-Hernández N, Sanford RA. 2006. *Geobacter lovleyi* sp. nov. strain SZ, a novel metal-reducing and tetrachloroethene-dechlorinating bacterium. *Appl Environ Microbiol*. 72:2775–2782.
- [18] Sung Y, Ritalahti KM, Sanford RA, Urbance JW, Flynn SJ, Tiedje JM, Löffler FE. 2003. Characterization of two tetrachloroethene-reducing, acetate-oxidizing anaerobic bacteria and their description as *Desulfuromonas michiganensis* sp. nov. *Appl Environ Microbiol*. 69:2964–2974.
- [19] Sung Y, Fletcher K, Ritalahti KM, Apkarian RP, Ramos-Hernández N, Sanford RA. 2006. *Geobacter lovleyi* sp. nov. strain SZ, a novel metal-reducing and tetrachloroethene-dechlorinating bacterium. *Appl Environ Microbiol*. 72:2775–2782.
- [20] Nevin KP, Holmes DE, Woodard TL, Covalla SF, Lovley DR. 2007. Reclassification of *Trichlorobacter thiogenes* as *Geobacter thiogenes* comb. nov. *Int J Syst Evol Microbiol* 57:463-6.

- [21] Coates JD, Bhupathiraju VK, Achenbach LA, McInerney MJ, Lovley DR. 2001. *Geobacter hydrogenophilus*, *Geobacter chapellei* and *Geobacter grbiciae*, three new, strictly anaerobic, dissimilatory Fe(III)-reducers. *Int J Syst Evol Microbiol*, 51: 581-588.
- [22] Nevin KP, Holmes DE, Woodard TL, Hinlein ES, Ostendorf DW, Lovley DR. 2005. *Geobacter bemidjensis* sp. nov. and *Geobacter psychrophilus* sp. nov., two novel Fe(III)-reducing subsurface isolates. *Int J Syst Evol Microbiol*, 55:1667-74.
- [23] Shelobolina ES, Nevin KP, Blakeney-Hayward JD, Johnsen CV, Plaia TW, Krader P, Woodard T, Holmes DE, Vanpraagh CG, Lovley D R. 2007. *Geobacter pickeringii* sp. nov., *Geobacter argillaceus* sp. nov. and *Pelosinus fermentans* gen. nov., sp. nov., isolated from subsurface kaolin lenses. *Int J Syst Evol Microbiol*, 57: 126-35.
- [24] Straub KL, Buchholz-Cleven BEE. 2001 *Geobacter bremensis* sp. nov. and *Geobacter pelophilus* sp. nov., two dissimilatory ferric-iron-reducing bacteria. *Int J Syst Evol Microbiol*, 51: 1805–1808.
- [25] Thauer RK, Jungermann K, Decker K. 1977. Energy conservation in chemotrophic anaerobic bacteria. *Bacteriol Rev* 41: 100-180.
- [26] Dolfig J. 2000. Energetics of anaerobic degradation pathways of chlorinated aliphatic compounds. *Microb Ecol* 40: 2-7.
- [27] Holmes DA, Harrison BK, Dolfig J. 1993. Estimation of Gibbs free energies of formation of polychlorinated biphenyls. *Environ Sci Technol* 27: 725-731.
- [28] Wu Q, Du Y, Huang Z, Gu J, Leung JYS, Mai B, Xiao T, Liu W, Fu J. 2019. Vertical profile of soil/sediment pollution and microbial community change by e-waste recycling operation. *Sci Total Environ*, 669: 1001-1010.
- [29] Ana, GB, Choi J, Ahn Y. 2019. Reductive dechlorination of perchloroethene (PCE) and bacterial community changes in a continuous-flow, two-stage anaerobic column. *Int Biodeter Biode* 138: 41-49.
- [30] Nino de Guzman GT, Hapeman CJ, Millner PD, Torrents A, Jackson D, Kjellerup BV. 2018. Presence of organohalide-respiring bacteria in and around a permeable reactive barrier at a trichloroethylene-contaminated Superfund site. *Environ Pollut* 243: 766-776.
- [31] Kao CM, Liao HY, Chien CC, Tseng YK, Tang P, Lin CE, Chen SC. 2016. The change of microbial community from chlorinated solvent-contaminated groundwater after biostimulation using the metagenome analysis. *J Hazard Mater* 302:144-150.
- [32] Mattes TE, Ewald JM, Liang Y, Martinez A, Awad A, Richards P, Hornbuckle KC, Schnoor JL. 2018. PCB dechlorination hotspots and reductive dehalogenase genes in sediments from a contaminated wastewater lagoon. *Environ Sci Pollut Res*, 25: 16376-16388.
- [33] Hieke AC, Brinkmeyer R, Yeager KM, Schindler K, Zhang S, Xu C, Louchouart P, Santschi PH. 2016. Widespread Distribution of *Dehalococcoides mccartyi* in the Houston Ship Channel and Galveston Bay, Texas, Sediments and the Potential for Reductive Dechlorination of PCDD/F in an Estuarine Environment. *Mar Biotechnol*, 18: 630-644.
- [34] Mattes, T.E., Ewald, J.M., Liang, Y., Martinez, A., Awad, A., Richards, P., Hornbuckle, K.C., Schnoor, J. L. 2018. PCB dechlorination hotspots and reductive dehalogenase genes in sediments from a contaminated wastewater lagoon, *Environ. Sci. Pollut. Res.* 25, 16376-16388.
- [35] Lee, J., Lee, T.K. 2016. Development and characterization of PCE-to-Ethene dechlorinating microcosms with contaminated river sediment. *J. Microbiol. Biotechnol.* 26, 120-129.
- [36] Dugat-Bony, E., Biderre-Petit, C., Jaziri, F., David, M.M., Denonfoux, J., Lyon, D.Y., Richard, J., Curvers, C., Boucher, D., Vogel, T.M., Peyretilade, E., Peyret, P. 2012. In situ TCE degradation mediated by complex dehalorespiring communities during biostimulation processes, *Microbiol. Biotechnol.* 5, 642-653.
- [37] Sutton, N.B., Atashgahi, S., van der Wal, J., Wijin, G., Grotenhuis, T., Smidt, H., Rijinaarts, 2015. *Microbial Dynamics During and After In Situ Chemical Oxidation of Chlorinated Solvents.*
- [38] Praveckova, M., Brennerova, M., de Alencastro, F., Holliger, C., Rossi, P. 2016. Indirect evidence link PCB dehalogenation with *Geobacteraceae* in anaerobic sediment-free microcosms. *Front. Microbiol.* 7, 933
- [39] Simsir, B., Yan, J., Im, J., Graves, D., Löffler, F.E. 2017. Natural Attenuation in Streambed Sediment Receiving Chlorinated Solvents from Underlying Fracture Networks. *Environ. Sci. Technol.* 51, 4821-4830.

- [40] Dang, H., Kanitkar, Y.H., Stedtfeld, R.D., Hatzinger, P.B., Hashsham, S.A., Cupples, A.M. 2018. Abundance of Chlorinated Solvent and 1,4-Dioxane Degrading Microorganisms at Five Chlorinated Solvent Contaminated Sites Determined via Shotgun Sequencing. *Environ. Sci. Technol.* 52, 13914-13924.
- [41] Nemecek, J., Dolinova, I., Machackova, J., Spanek, R., Sevcu, A., Lederer, T., Cernik, M. 2017. Stratification of chlorinated ethenes natural attenuation in an alluvial aquifer assessed by hydrochemical and biomolecular tools. *Chemosphere* 184, 157-1167.
- [42] Miura, T., Yamazoe, A., Ito, M., Ohji, S., Hosoyama, A., Takahata, Y., Fujita, N. 2015. The Impact of Injections of Different Nutrients on the Bacterial Community and Its Dechlorination Activity in Chloroethene-Contaminated Groundwater Microbes. *Environ.* 30, 164-171.
